# Supplementary material for: Applying stacking ensemble method to predict chronic kidney disease progression in Chinese population based on laboratory information system: a retrospective study
Source: PeerJ journal article supplement (doi:10.7717/peerj.18436), 2024-11-01
Supplement: human_participant_information_sheet.xlsx [file human_participant_information_sheet.xlsx]

## Sheet: Sheet1
Number	Name	Gender	Age	Admission time	ID	Phone number	Agreest
