# Supplementary material for: Applying stacking ensemble method to predict chronic kidney disease progression in Chinese population based on laboratory information system: a retrospective study
Source: PeerJ journal article supplement (doi:10.7717/peerj.18436), 2024-11-01
Supplement: raw_data2.xlsx [file raw_data2.xlsx]

## Sheet: Sheet1
TIME	Number	ESRD	SEX	AGE	Cr	eGFR	24Upr	ALB	ChE	HDL	CO2	Ca	TG	HDL	GGT	ALT	AST	K	ALP	P	CL	Mg	Na	Urea	Ua	GLU	PA	TBIL	DBIL	IBIL	TCHO	TBA	TP	WBC	Monocyte count	RBC	RDW	Lymphocyte count	MCH	MCHC	MCV	MPV	HGB	HCT	PCT	PLT	PDW	Neutrophil count
625	1	1	female	50	152.91	33.9489	0.61	40.8	8084	3.38	25.41	2.38	1.6	1.31	172	73	45	4.72	91	1.15	109.1	0.84	139.47	9.03	419	4.94	291	9.3	2.69	6.61	5.65	1.85	72.1	3.92	0.2	3.38	13.6	1.2	32.2	332.5	96.8	8.73	109	32.7	0.17	189	17.3	2.2
1708	2	0	male	82	118	49.2144	0.1	41.6	7160	1.88	25.3	2.5	1.07	1.66	12	9	17	3.7	49	1.13	105	0.81	139	6.74	373	5.08	253.2	19.7	4.31	15.39	4.06	9.3	71.5	6.5	0.5	5.09	14.2	2.1	30.5	323.4	94.4	8.02	155	48.1	0.12	152	16.2	3.6	21.1073
533	3	1	male	30	219.7	33.4475	2.7	33.2	6632	5.85	25.5	2.17	2.24	0.93	14	10	21	3.68	60	0.98	106.5	0.87	138.68	9.81	504	4.35	344.6	12.7	1.4	11.3	8.18	0.73	60	6.08	0.31	4.82	12.5	2.03	29.9	339	88.2	8.9	144	42.5	0.27	299	16.3	3.57	24.8016
1757	4	0	male	32	145	54.5056	4.51	31.2	10715	4.81	23.7	2.18	4.2	0.99	55	21	18	4.4	69	1.29	110	0.87	142	8.49	415	6.01	311.2	4.7	0.3	4.4	8.65	10.2	60.7																27.3797
419	5	1	female	58	135	37.3104	0.02	42.6	9158	3.09	22.9	2.35	0.79	1.43	19	25	30	4.3	83	1.23	109	0.97	147	9.85	441	4.49	265.3	5.8	0.3	5.5	5.13	1.5	76.8	4.64	0.3	3.92	14.3	2	29.9	317.6	94.1	9.77	117	36.9	0.16	162	17.6	2.2	18.5547
1218	6	0	male	82	102	58.6948		42.7	6719	2.33	27.9	2.27	0.9	1.36	27	18	18	3.5	39	1.21	104	0.92	143	7.19	384	5.8	245.6	28.8	5.63	23.17	4.28	2.5	71.7	7.27	0.8	4.53	13.3	2	31.3	333.7	93.8	8.34	142	42.5	0.18	212	17	4.3	24.0346
677	7	1	male	53	138	49.9293	8.76	27.5	10703	4.98	33.4	2.14	5.21	0.95	10	12	14	3.8	59	1.3	101	0.9	137	6.11	385	9.88	300.9	1.5	0.2	1.3	7.92	3.9	56.5	12.26	0.7	4.66	13.2	2.4	27.9	326.4	85.5	8.55	130	39.8	0.24	275	17.1	8.9	31.5617
1638	8	0	male	59	120	56.6806		39.8	8942	2.33	28.3	2.15	1.1	1.02	29	13	16	3.4	53	0.86	104	0.91	140	7.43	329	4.46	187.1	13.5	2.2	11.3	3.84	3.3	71.9																22.0932
443	9	1	male	48	138	51.7141	5.71	34.6	11378	3.49	25.5	2.36	1.84	1.33	28	10	10	4.1	54	1.08	110	0.76	145	9.98	426	4.85	333.9	7.6	0.2	7.4	5.59	1.6	61.8	9.32	0.9	5.55	12.8	1.6	27.2	321.5	84.7	10.27	151	47	0.07	64	18	6.7	26.6728
994	10	0	female	25	138	45.8104	3.52	30.4	6317	2.42	27.2	2.22	2.13	2.67	15	16	12	4.2	49	1.35	109	0.84	147	8.46	343	5.17	444.3	15.4	0.65	14.75	6.15	2.5	59.2	15.34	1.2	4.52	13.5	3.4	30.7	336.5	91.1	8.12	139	41.2	0.15	187	16.6	10.6	20.7031
756	11	1	female	29	119	53.2769	0.28	43.1	8903	1.92	25.5	2.31	0.76	1.41	13	9	9	4.2	65	1.01	104	0.78	139	9.68	515	5.43	252.1	1.6	0.5	1.1	3.82	2.9	72.5	7.51	0.5	4.09	13.7	2.2	27.9	327.2	85.3	8.5	114	34.9	0.22	257	17.2	4.6	25.8166
1370	12	0	male	60	155	41.305		40.6	9605	3.05	27	2.36	1.59	0.86	422	59	58	3.6	180	0.9	101	0.78	139	11.13	354	6.95	209	8	1.41	6.59	4.72	17.7	81.9	10.77	0.9	4.62	12.3	2.7	31.9	344.2	92.6	7.09	147	42.8	0.26	362	16.5	6.4	28.7197
1471	13	1	male	74	159	36.3006	7.82	35.2	7742	2.86	26.6	2.16	3.16	0.69	23	12	10	4.2	65	1.04	103	0.88	138	8.42	358	7.73	215.2	7	0.1	6.9	4.93	3.1	64.8	10.1	0.8	5.51	14	1.4	31.1	327.6	94.8	8.92	171	52.2	0.22	249	17.3	7.7	28.9062
1812	14	0	female	53	153	33.2174		36.3	6079	2.55	19.6	2.14	2.03	0.88	15	8	9	4	46	1.24	108	0.91	140	12.81	437	5.01	197.6	2.9	0.3	2.6	4.61	2.3	64.8	6.92	1	2.94	13.3	1.2	32	338.2	94.5	7.29	94	27.8	0.13	182	16.7	4.7	24.6094
420	15	1	male	45	167	41.9383	3.19	39.2	9776	3.17	23.5	2.16	2.46	0.84	21	20	13	3.5	55	1.38	107	0.85	141	14.86	480	8.13	414.4	7	0.03	6.97	4.9	1.6	65.7	8.07	0.6	5	14	1.9	30.7	341.5	90	7.76	154	45	0.18	226	16.4	5.5	28.075
514	16	0	male	46	135	53.8581	4.19	39.8	12180	2.4	27.7	2.41	2.59	1.1	33	14	20	3.9	52	1.03	106	0.84	143	6.35	532	5.52	452.1	12.7	0.7	12	4.63	2.7	68.5	10.9	0.57	4.89	12.7	3.66	29.2	330	88.4	9	143	43.2	0.27	303	16.2	6.21	20.8209
421	17	1	male	32	144	54.9636		45.6	10879	3.13	23	2.27	3.38	0.93	41	57	21	3.7	66	1.24	108	0.94	145	9.34	435	4.9	441.3	12.1	1.12	10.98	5.33	6.9	80.9	11.61	0.8	4.97	13	3.1	30	338.7	88.5	9.04	149	44	0.22	244	17	7.6	26.0185
645	18	0	male	32	163	47.3152	0.57	46.3	8500	2.78	25.1	2.27	1.79	0.9	18	15	11	4.5	66	0.95	104	1	141	12.12	459	4.6	332.4	16	2.55	13.45	4.31	3.9	76.5	5.87	0.4	5.86	12.7	1.4	29	331.2	87.6	7.65	170	51.4	0.15	195	16.8	3.9	35.7696
571	19	1	female	35	155.1	37.0784	6.78	37.5	9610	1.54	23	2.26	6.4	0.91	37	19	18	4.38	104	1.09	109.1	0.9	139.42	9.6	499	4.13	369.1	15.2	2.1	13.1	4.23	3.9	71	11.45	0.6	4.8	13.6	2.6	28.9	334.2	86.4	7.1	139	41.5	0.33	468	16.6	7.8	24.0238
1000	20	0	male	62	154	41.0488	2.31	40.2	8829	2.33	23.8	2.4	1.51	0.98	27	28	20	5	62	1.43	105	0.87	139	11.64	246	5.71	283.4	6.9	0.2	6.7	4.2	3.6	68.4	6.73	0.6	3.01	13.6	0.6	32.3	329.3	98.2	7.52	97	29.5	0.18	240	16.4	5.4	28.9062
466	21	1	male	47	145	49.0546	2.45	40.3	9037	1.11	22.6	2.34	1	1.05	42	15	17	4.8	77	1.44	110	0.94	146	9.54	483	6.87	220	4.9	0.21	4.69	2.62	1.1	77.9	6.71	0.4	3.52	13.2	1.4	29.7	332.1	89.4	8.36	105	31.5	0.13	157	17.3	4.7
1491	22	0	male	53	121	58.5304	0.78	41.7	10313	3	26.4	2.31	1.47	0.93	36	37	20	3.8	77	1.15	107	0.87	144	5.2	382	5.4	289.6	18.7	2.69	16.01	4.6	1.7	78.5	8.7	0.6	5.26	13.2	3	31.4	348	90.2	9.1	165	47.5	0.21	228	16.8	4.8	28.7197
588	23	1	male	49	172	39.3476	1.11	42.8	9002	1.7	24.2	2.28	1.73	1.06	19	27	17	5	107	1.06	110	0.9	144	10.35	361	5.57	324.3	8.9	0.92	7.98	3.39	2	64.7	5.56	0.3	4.94	13.4	1.2	30.1	332.6	90.4	9.37	149	44.7	0.16	167	16.9	3.9
1716	24	0	male	49	141	50.0341	1.44	41.3	8693	2.54	24.9	2.23	2.39	0.76	22	19	18	4.4	63	0.97	108	0.89	146	8.27	396	5.15	344	12.9	1.69	11.21	3.85	2.2	73	6.6	0.5	5.5	13	2	28.6	323.1	88.5	9.89	157	48.7	0.15	147	17.4	3.9	26.1224
1006	25	1	male	24	224	34.0793		41.5	11855	4.21	27.9	2.36	1.53	1.4	42	16	17	5.3	109	1.11	107	1.07	141	14.13	266	4.88	390.6	9.2	0.23	8.97	6.43	1.9	73.6	6.07	0.4	4.57	13	1.9	29.4	322	91.4	8.59	135	41.8	0.2	231	17.2	3.7	20.5986
770	26	0	male	28	152.6	52.7012	1.07	41.6	4119	2.09	24.4	2.05	1.58	0.82	11	12	20	4.22	67	1.37	107.1	0.94	140.15	9.25	314	5.26	291	8.1	1.1	7	3.51	2.06	70.5	4.96	0.2	3.6	12.8	1.7	29.7	339.9	87.4	7.39	107	31.5	0.2	267	16.9	2.8	21.0105
830	27	1	male	59	151	42.9321	2.58	36.2	10007	1.38	20.3	2.15	2.9	0.81	31	27	19	4.6	77	1.46	107	0.94	137	17.43	339	8.17	241.5	1.7	0.3	1.4	3.2	4.2	63																23.1834
1252	28	0	male	64	151	41.4503	0.81	45.1	11960	3.33	23.9	2.32	3.31	0.93	38	14	13	4.3	66	1.17	104	0.95	139	9.3	384	6.46	353.5	5.4	0.3	5.1	5.75	9.8	71.8	9.67	0.9	4.56	13.4	3	29.9	331.2	90.2	7.9	136	41.1	0.16	205	16.8	5.7	24.2215
217	29	1	male	30	191	39.6157	1.52	37	8383	1.55	24.3	2.11	4.52	0.58	18	22	27	4.9	72	1.12	105	0.91	139	11.57	439	5.1	311.5	4	0.2	3.8	3.61	2.7	76.6																23.8367
1567	30	0	male	32	193	38.5741	0.47	41.4	10079	3.1	24.5	2.24	2.63	1.1	22	32	18	4.3	69	0.98	103	0.91	142	9.24	435	6.2	328.8	9.5	0.57	8.93	5.16	1.8	73.8																29.0657
498	31	1	male	48	156	44.5898	11.12	20.3	12759	3.48	25.4	1.96	1.62	1.04	31	26	22	4.7	63	1.45	112	1.17	142	11.19	400	6.16	243	5.6	0.2	5.4	5.75	1.3	46.9	6.17	0.4	4.85	14.1	1.3	30.3	328.5	92.1	8.38	147	44.7	0.2	244	17.4	4.3	29.6875
1665	32	0	male	44	157	45.5075	0.39	44.5	9018	1.4	27.3	2.44	1.81	0.76	19	11	13	4.9	71	1.08	106	0.8	142	10.92	382	5.55	363.1	7.3	0.35	6.95	3.2	0.9	78	5.28	0.3	3.48	12.2	1.4	32	337.4	94.8	5.92	111	33	0.16	278	16.2	3.4	24.2215
541	33	1	male	71	171	33.9518	5.79	41.7	12867	3.35	33	2.27	2.03	0.98	43	15	20	3.1	65	0.88	99	0.93	141	8.16	552	6.03	284.3	8.4	0.77	7.63	5.48	6	73.5
1215	34	0	female	36	154.2	37.0788	1.64	39.5	7703	3.16	24.97	2.36	1.36	1.03	20	15	20	4.59	69	1	105.3	0.97	136.39	12.03	454	4.23	286.1	10.3	2.07	8.23	4.94	2.62	76.2	6.19	0.4	3.98	12.5	1.5	31.8	338.6	93.9	7.67	127	37.4	0.21	271	16.3	4.1	19.9219
561	35	1	male	50	182	36.4918		42.8	5261	1.92	21.9	2.27	0.65	1.45	25	15	15	3.8	52	1.18	107	0.8	140	11.07	545	5.55	268.7	6	0.45	5.55	3.51	7.6	73.5	4.9	0.4	3.91	12.4	2	32.5	350	92.7	7.7	127	36.3	0.17	223	17.1	2.4	21.6049
1743	36	0	male	56	150.77	43.9273	5.34	30.5	8778	3.98	26.82	2.19	1.92	0.92	21	16	16	4.03	58	1.19	109.8	0.93	141.89	7.27	386	5.65	296.3	6.7	0.8	5.9	6.07	2.42	61.7	8.8	0.7	4.23	13.6	2.2	30.4	330.5	92	8.35	129	38.9	0.27	319	16.5	5.5	27.3356
132	37	1	male	53	152.3	44.3185	4.9	33.4	8290	1.93	22.37	2.26	2.18	0.79	84	30	22	5.41	89	1.41	111.8	0.92	138.22	11	476	8.73	263.8	6.6	0.88	5.72	3.69	2.2	67.7	9.42	0.7	3.08	12.2	1.6	30.9	338.3	91.4	7.25	95	28.1	0.17	239	16.5	6.8	23.5294
90	38	0	male	58	137	48.6318	16.48	17.8	12496	4.45	24.6	2.04	3.21	1.1	36	13	10	4.2	107	1.2	110	0.79	142	8.68	263	5.38	214.2	2.7	0.2	2.5	8.38	0.1	54.2	10.03	0.7	3.8	13	3	31.8	343.9	92.4	7.68	121	35.1	0.33	434	16.3	6.1	19.8352
1357	39	1	male	64	168	36.4344	1.67	40.3	7026	2.44	26	2.3	1.06	1.07	15	14	19	4.2	39	1.1	104	0.76	138	7.68	378	3.42	281.3	8.8	0.91	7.89	4.14	1.5	71.7	6.85	0.5	3.86	13.1	2.6	32	335.9	95.4	9.05	124	36.9	0.21	237	17	3.5
1729	40	0	male	58	174	36.4243		46.1	7442	1.83	26	2.44	0.96	1.16	14	7	11	4.1	59	0.91	105	0.95	142	9.55	434	5.72	283.4	9.5	1.5	8	3.61	4.3	75.1	5.49	0.5	4.38	13.7	0.5	32.4	337.4	96.1	7.37	142	42.1	0.16	222	16.1	4.4	15.605
906	41	1	male	43	177.57	39.4902	1.41	45.6	9329	4.62	24.69	2.52	3.16	1.02	45	39	29	4.49	69	1.02	103.1	0.85	136.31	10.04	469	6.17	386.3	11.1	2.12	8.98	6.94	3.16	82.7																29.3962
1628	42	0	male	41	129	58.9353		48.6	9851	3.57	23.3	2.55	1.74	1.65	58	25	21	4.9	62	0.97	107	0.96	145	7.75	405	5.78	379.4	23.3	3.45	19.85	6.08	1.8	81.8	4.97	0.3	5.04	11.9	2.2	32	334.3	95.7	8.45	161	48.3	0.16	193	16.8	2.3	24.8163
86	43	1	male	59	125.88	53.4955		17.4	9845	3.5	23.84	1.79	3.56	0.95	21	11	18	4.09	42	1.15	114	0.98	140.03	11.51	296	4.98	213.5	6.5	0.58	5.92	7.55	1.31	43.6	4.59	0.2	3.14	13.2	2.3	32.2	341.5	94.3	6.91	101	29.6	0.13	186	16.7	1.7	23.5294
1764	44	0	male	57	136	49.4103	0.16	39.6	6851	1.85	26.2	2.35	2.15	0.73	21	19	21	3.9	75	1.13	103	0.99	140	7.15	386	5.87	320.3	8.2	0.46	7.74	3.38	3.6	73.6	5.37	0.5	3.87	13	1.2	31.1	331.3	93.9	6.83	120	36.4	0.17	251	16.3	3.5	23.8895
748	45	1	female	29	182	31.8749	0.44	44.4	6334	3.72	22.1	2.21	0.72	1.54	14	9	14	5	73	1.53	109	1.12	143	12.27	507	5.78	278.4	7.5	0.2	7.3	5.59	5.5	70.1																18.75
1162	46	0	male	52	142	48.5739	1.17	38.7	4649	2.85	23	2.22	0.87	1.46	14	14	24	4.7	41	1.15	108	0.89	143	10.64	400	5.24	402.6	8.5	0.42	8.08	4.84	2.2	74.3	5.9	0.4	4.26	12.5	1.8	32	343	93.3	7.9	136	39.8	0.16	207	16.9	3.2	22.3094
1467	47	1	male	46	142	50.665	1.53	43.7	9916	3.23	23.6	2.36	3.11	0.99	29	23	19	4.3	95	1.03	108	0.94	147	14.58	603	5.43	357.9	18.6	2.5	16.1	5.38	2.3	73	11.1	0.6	6.19	14.7	1.9	31.6	332	94.9	10.1	195	58.8	0.19	191	17.2	8.3	27.6817
154	48	0	male	49	122	59.6023	0.25	40.9	10160	2.55	28.6	2.29	2.87	0.76	60	79	31	3.9	68	1.04	107	0.93	146	8.65	574	6.95	303.3	7	0.31	6.69	4.32	9.7	79.3	7.5	0.7	5.38	13.1	2.7	29.9	337	88.9	8.6	161	47.9	0.19	221	17.2	3.9	33.4124
413	49	1	male	37	160	46.7197	3.12	41.6	10191	2.07	28.5	2.36	5.05	0.9	40	18	17	5.3	49	1.01	107	0.84	143	7.48	425	5.02	383.2	6.4	0.8	5.6	4.68	1.4	76.6	9.6	0.6	4.63	14.2	2.5	28.4	311	91.4	9.9	131	42.3	0.26	262	17.8	6	27.6817
924	50	0	male	34	154.7	49.6981	0.76	46.3	8960	3.65	32.4	2.4	1.66	0.93	27	46	32	4.94	87	1.09	105.7	0.82	144.2	9.95	690	6.16	360.6	8.9	1.5	7.4	5.45	1.11	78.9																23.9995
595	51	1	male	72	149.01	39.8187	10.97	32	13486	2.35	24.16	2.31	3.66	1.11	46	14	14	5.1	76	1.21	112.7	0.95	141.12	14.68	418	6.96	303	5	1.23	3.77	5.13	3.59	62.7	9.45	0.58	4.78	17.7	2.3	28.4	323	87.9	7.9	136	42	0.18	224	15.5	6.21	25.2493
1478	52	0	male	76	157	36.3462		40.3	8173	3.04	23.5	2.2	2.28	1.09	22	8	13	5.3	64	0.88	106	0.86	141	9.6	546	5.53	235.1	9.5	0.76	8.74	5.17	6.6	80.9	7.6	0.8	4.9	14.3	2.4	29.1	332.8	87.4	6.92	142	42.8	0.16	235	16.7	4.3	25.3934
475	53	1	female	64	97	53.3448		41.5	7081	2.45	28.2	2.18	2.9	1.51	20	20	18	4.2	67	0.9	106	0.85	142	5.2	379	5.77	245.3	10.4	0.54	9.86	5.23	2.3	75.1	5.06	0.3	4.41	13.6	2.4	27.6	321.8	85.7	8.25	122	37.8	0.23	284	16.8	2.2	34.2936
1735	54	0	female	59	110	47.4579		42.6	7494	2.86	23	2.27	1.18	1.43	17	14	27	4.2	81	0.99	110	0.89	147	9.39	326	4.94	210.8	4.9	0.3	4.6	4.81	1.3	72.4	5.24	0.4	4.16	13.8	1.7	28	322.4	86.8	7.99	116	36.1	0.15	182	16.8	2.9	22.0386
1183	55	1	female	67	148	31.3401		42.2	10769	1.24	19	2.34	2.52	0.9	29	15	16	4.8	115	1.13	113	1.05	143	19.58	357	6.38	367.2	7	0.18	6.82	3.31	0.7	73.9	5.2	0.3	3.56	13.9	1.7	31.6	327.6	96.6	8.99	113	34.3	0.16	174	17.5	3
553	56	0	female	60	137	36.1415	0.56	43.9	9761	3.44	20.5	2.34	1.41	2.01	27	12	14	3.6	45	1.22	110	1	146	12.43	355	4.99	330.9	5.1	0.3	4.8	6.34	12.6	74.6	7.19	0.7	5.07	14	1.6	27.8	315.9	88	7.87	141	44.6	0.17	221	17.4	4.8	19.4674
820	57	1	female	62	145.86	33.0371	1.24	41.8	8988	3.05	25.89	2.52	2.15	1.24	18	14	19	4.34	33	1.23	106.3	0.76	141.41	13.33	437	6.78	343.9	8.5	1.05	7.45	5.63	3.84	74.8	8.56	0.6	4.38	13.9	1.7	26.6	325.6	81.7	8.19	116	35.8	0.21	251	17	6.1	31.2488
727	58	0	female	66	100	50.6987		41	7629	3.71	22.2	2.34	2.15	1.51	14	11	21	4.1	119	1.15	102	0.86	138	6.72	319	7.88	265.5	5.8	0.3	5.5	6.49	2.4	88.6	4.59	0.5	4.15	15.3	2.6	29.8	322	92.6	9.15	124	38.5	0.16	179	16.9	1.4	23.7387
482	59	1	male	43	170	41.6259		41.7	12001	3.43	27.1	2.29	3.96	1.12	32	18	18	4.1	31	1.06	104	0.78	142	11.6	428	5.02	365.1	6.7	0.14	6.56	6.09	1.5	73.4	7.97	0.5	4.91	13.2	1.9	28.8	330.8	87	8.33	141	42.8	0.25	297	16.4	5.1	25.7117
1128	60	0	male	42	177.7	39.7334		41.6	9716	2.28	26.8	2.31	2.71	0.73	28	15	18	4.56	65	0.83	107.8	0.99	139.85	9.52	418	4.74	357.9	10.3	1.9	8.4	4.14	8.53	69.6																30.3871
329	61	1	male	64	122	53.6416	10.45	21.8	13845	3.53	21	2	6.91	1.04	21	20	27	3.9	61	0.92	109	0.89	141	8.3	298	7.67	213.5	5.2	0.6	4.6	9.43	0.4	54.3	6.01	0.3	5.01	14	2.5	31.4	331.6	94.6	9.36	157	47.4	0.21	225	17.2	3.1	27.0416
1400	62	0	female	37	110	55.3892	0.16	44.1	8728	2.69	24.2	2.31	1.11	1.39	13	9	14	4.6	34	0.93	105	0.82	141	6.37	355	5.18	299.1	6.8	0.2	6.6	4.73	1.8	76.1	5.39	0.3	4.33	12.7	2	31.6	329.5	95.9	7.45	137	41.5	0.13	170	16.6	2.8	28.125
1476	63	1	female	29	161	36.9677	3.34	28.8	7567	3.11	24.2	2.11	1.43	1.81	26	16	28	5.3	64	1.76	108	0.9	142	7.76	329	3.78	243.4	2.2	0.5	1.7	6.06	0.5	59.5	8.06	0.4	3.49	13.6	2.1	29.1	324.1	89.9	8.24	102	31.3	0.23	274	17.7	5.5	22.6326
1061	64	0	male	53	174	37.7264		42.5	5454	2.18	29	2.26	2.07	0.91	25	14	19	4.2	65	1.03	104	0.96	143	6.89	450	5.42	338.5	21.5	4.09	17.41	4	5.4	68	6.83	0.5	5.19	12.5	1.5	31.6	334.9	94.5	8.8	164	49	0.11	121	17.1	4.6	24.5089
430	65	1	female	73	117	39.9214		42.8	8148	2.95	21.3	2.35	2.44	1.13	26	11	18	4	111	1.15	110	0.91	144	7.83	421	7.09	215.7	4.9	0.8	4.1	5.37	2.8	70.6	4.82	0.7	3.92	13.9	1.3	29.4	325.7	90.2	8.09	115	35.4	0.2	246	17	2.6	27.7008
1257	66	0	female	62	95	55.4795	0.96	42	8166	1.92	27.6	2.5	1.46	3.5	19	10	21	4.2	63	1.21	103	0.88	140	7.59	338	3.47	308.1	16	1.33	14.67	6.21	4.2	66.1	9.32	0.7	3.43	12	2.1	32.5	339	95.7	8.2	112	32.9	0.19	236	16.2	6.4
60	67	1	male	54	187	34.337	6.45	17.1	5960	3.9	26.4	1.8	2.18	1.44	21	12	14	3.6	39	1.08	107	0.77	140	15.89	294	4.42	231.7	4.1	0.8	3.3	6.94	0.4	37.5	16.15	0.9	3.26	14.9	1	29.3	333.5	87.8	8.08	96	28.6	0.27	330	16.9	14.1	25.4017
397	68	0	male	50	128	55.8476	0.86	40.3	10563	1.4	25	2.28	10.36	1.03	109	17	28	3.7	38	0.99	102	0.75	138	6.74	517	5.49	477.9	8.7	0.6	8.1	5.98	4.4	81.2																23.9995
472	69	1	female	20	166.8	37.7309	3.42	35.2	8099	3.27	22.7	2.28	2.92	1.09	7	9	17	4.92	86	1.58	109.7	0.98	139.93	8.6	309	5.37	366.5	7.9	1	6.9	5.63	0.99	64.6	7.1	0.3	3.97	12.9	1.8	30.8	347	88.8	9.1	122	35.3		271		4.9	16.1843
898	70	0	female	20	129.66	51.1622		14.5	4942	3.63	27.12	1.75	2.06	1.41	31	36	37	3.35	72	0.55	111.6	0.87	142.85	19.39	468	4.25	110.2	6.9	0.91	5.99	6.19	2.4	35.7																21.9388
70	71	1	female	57	92	59.7358	6.58	35.4	7628	2.19	24.9	2.32	3.6	2.11	56	34	27	4.3	34	0.94	103	0.94	139	11.15	318	5.42	389.8	6.5	0.02	6.48	5.94	2.2	61.9	7.67	0.6	3.7	13.3	1.5	30.8	340.2	90.4	9.49	114	33.5	0.19	198	16.8	5.5	26.6389
1397	72	0	male	77	152	37.5321		42.3	7754	1.23	25.2	2.31	2.48	0.67	11	12	17	3.7	81	0.82	107	0.96	143	8.49	589	6.55	251.7	27.8	6.5	21.3	2.96	4.5	76.4	13.69	1.5	5.1	13.4	1.1	29.4	335.5	87.7	7.5	150	44.8	0.2	267	16.4	11	25.9695
1029	73	1	male	55	174.6	37.0456	0.82	45.5	8006	1.75	24.87	2.3	1.3	0.98	30	22	20	4.12	58	0.81	106.1	0.85	138.91	10.19	495	4.91	358	21.5	3.35	18.15	2.97	2.09	70.3
779	74	0	female	34	115	53.609		44.9	7849	4.1	29.8	2.47	1.27	1.49	23	25	18	4.6	56	1.11	103	0.86	138	5.26	467	5.46	344.3	9.3	0.41	8.89	6.21	1.1	80.6	5.26	0.46	4.59	12.9	1.36	29.6	332	89.2	7.8	136	40.9	0.22	275	15.8	3.34	26.4463
238	75	1	male	26	190	41.004		44.2	7683	3.49	29.3	2.39	2	1.1	24	40	22	4.5	73	1.19	107	0.96	142	9.31	632	5.26	413.1	10.3	0.17	10.13	5.97	1.6	77.5	6.4	0.3	4.37	12.3	1.4	32.4	337	96.1	8.05	141	41.9	0.2	252	17.4	4.4	20.8307
1046	76	0	male	30	144	55.7412	2.07	45.2	9199	1.43	24.9	2.37	1.34	1.03	35	25	12	4	83	1.25	105	0.75	142	8.84	572	5.2	289.4	6.3	0.42	5.88	2.9	0.9	79.4	18.16	1.3	5.59	12.3	2.9	29.1	326.1	89.4	9.98	163	49.9	0.28	276	17.2	13.5	31.6735
1467	77	1	male	27	225	33.1895	1.38	44	8981	2.03	26.2	2.14	1.19	0.92	15	10	10	4.7	70	1.2	106	0.95	140	10.41	404	4.7	426.1	26.9	6.51	20.39	3.54	5.7	70.1	6.93	0.4	5.54	13.3	2.5	29.7	333.9	89	9.63	165	49.3	0.17	178	17.3	3.9	23.5036
1057	78	0	male	28	198.61	38.3226	2.66	35.5	5181	2.16	26.09	2.42	2.4	0.98	33	25	11	4.42	40	1.76	106.8	0.84	139.54	12.29	520	4.78	368	7.9	2.69	5.21	4.16	0.67	64.1	14.28	0.8	4.02	13	2.9	30.2	328.2	91.9	10.72	121	36.9	0.23	215	17.7	10.5	31.0204
374	79	1	male	27	215	35.0647	16.47	13.4	8414	3	23.3	1.71	7.38	0.61	5	11	13	3.1	54	1.09	114	0.68	144	5.81	153	4.71	135.3	2.3	0.1	2.2	10.37	0.6	36.9	4.52	0.3	4.35	14.5	1.7	27.2	331.6	82.1	7.48	118	35.7	0.23	309	17	2	22.5534
889	80	0	male	28	173.85	45.016	0.67	44.8	7855	1.84	24.2	2.49	2	0.8	27	47	27	3.92	87	1	105.4	0.88	139.02	7.05	338	4.32	287.2	18.1	3.01	15.09	3.36	3.62	82.9	7.56	0.7	5.99	13	2	28.5	329.3	86.6	8.27	171	51.9	0.2	238	16.5	4.6	31.6522
742	81	1	male	31	139	57.7671	1.62	43.9	7228	2	22.7	2.33	1.93	1.04	24	11	15	4.7	91	0.85	108	0.94	142	9.91	460	5.18	319.4	10.4	1.29	9.11	3.76	2.3	71.5	8.51	0.5	4.54	12.4	2.7	29	332.6	87.3	10.15	132	39.7	0.24	235	16.6	5.2
860	82	0	male	35	224.7	31.4264	6.69	25.3	6290	3.23	20.6	2.02	0.87	1.94	128	48	16	4.31	60	1.79	117.1	0.88	142.66	14.74	466	4.62	365.1	5.8	0.5	5.3	6.4	1.13	45.2	11.4	0.8	2.95	15	3.3	28.9	327	88.3	8.6	85	26		318		7.3	22.0819
110	83	1	male	35	131.74	59.93		45	7427	3.32	26.77	2.35	1.5	1.02	14	17	18	3.5	55	0.85	106.5	0.86	142.51	6.55	349	4.83	341.3	13.4	2.83	10.57	5.13	1.42	74.6	4.76	0.3	4.65	12.6	1.8	33	348.7	94.7	10.42	154	44	0.16	156	18	2.5	33.8189
763	84	0	male	35	134	58.7101	4.66	41.4	8870	3.14	25.5	2.24	1.95	0.82	11	14	16	4	38	1.07	107	0.89	142	6.77	406	5.41	369.3	15.4	1.73	13.67	4.97	2.4	66.6	4.6	0.3	4.74	12.8	1.2	31.2	343	91	8.5	148	43.2	0.15	174	17.5	3	23.7654
1067	85	1	male	38	151	49.7562	1.42	42.3	7317	3.69	27.7	2.44	1.42	1.28	13	11	15	4.1	37	1.14	103	0.89	139	6.27	412	4.8	328.2	9.2	0.39	8.81	5.71	2.4	66.6	5.8	0.7	5.07	13.7	1.6	29.3	335	87.3	9.9	148	44.2	0.17	169	17	3.4	21.2245
962	86	0	male	39	197	35.8237	1.68	40.5	12503	2.09	28.2	2.28	8.82	0.8	26	19	17	4.3	67	0.89	107	0.93	141	8.87	299	5.65	409.3	6.5	0.2	6.3	5.56	6.9	69.8																27.6361
460	87	1	female	25	171.39	35.2525	0.71	34.6	6796	2.98	25.33	2.22	0.47	1.98	9	6	15	4	42	1.22	106.5	0.92	138.76	10.09	555	6.64	295.8	8.4	0.58	7.82	5.81	2.59	61.4	5.7	0.4	3.31	12.5	1.1	30.1	326	92.2	9.6	99	30.5		130		4.2	19.7232
1646	88	0	male	58	161	40.0095		41.9	9847	4.26	28.7	2.35	1.18	1.77	13	15	13	4.3	65	0.89	107	0.92	144	6.55	441	5	327.6	15.7	1.38	14.32	6.57	2.2	76.2	8.86	0.5	4.82	14	2.8	30.2	328.3	91.9	7.53	146	44.3	0.18	243	16.2	5.2	21.4643
761	89	1	male	52	196	32.899	4.52	41.8	7973	2.7	25	2.18	3.92	0.88	28	16	16	4.8	69	0.92	108	0.94	144	7.21	338	7.74	353.3	16.7	1.68	15.02	5.32	0.8	70.1	5	0.3	4.75	12.6	1	30.9	339.9	90.8	9.03	147	43.1	0.13	143	17.6	3.6	25.6055
1400	90	0	male	47	202	32.8552	0.95	40.5	6840	2.53	22.4	2.26	1.17	1.15	163	51	31	4.5	76	1.12	108	0.86	145	10.79	389	4.73	328	10.6	1.4	9.2	4.07	4.3	70.1	6.4	0.5	4.48	13.3	1.9	31.2	339	92.3	6.4	140	41.3	0.16	257	16.8	3.5	22.2041
1018	91	1	male	30	195	38.6353	2.51	44.1	9369	3.75	24.9	2.45	2.19	1	37	18	15	4.6	70	1.05	105	0.98	142	8.96	588	6.05	316.2	13	1.32	11.68	5.68	0.9	74.4	10.12	0.6	5.15	13.6	2.8	29.9	338	88.4	9.27	154	45.5	0.29	311	17.1	6.4	28.3675
819	92	0	male	27	213	35.4632	0.66	44.4	8983	2.3	20	2.37	2.72	0.85	23	15	17	5	102	0.89	106	0.72	145	10.58	453	4.48	312.8	8.9	0.47	8.43	4.28	0.9	79.2	6.02	0.4	4.22	12.1	2	31	343.7	90.1	8.46	131	38.1	0.18	217	16.7	3.4	24.3974
653	93	1	female	48	105	54.2367	0.58	41.7	9679	2.58	22.1	2.5	0.76	0.93	28	22	21	4.7	48	1.32	109	1.02	145	6.69	450	9.13	239.8	12.2	2.46	9.74	3.9	4	73.7	5.45	0.5	4.71	12.4	1.1	29.8	342.1	87.2	8.7	140	41	0.13	150	17.4	3.7	24.0346
1343	94	0	female	52	163	30.9865		38.3	7435	2.89	26.2	2.21	1.4	1.91	11	10	18	4.7	73	1.29	109	1.1	144	11.88	521	5.17	360.3	6.3	0.6	5.7	5.63	4.9	78.1	5.2	0.3	3.97	14.2	1.6	30.6	316.9	96.6	9.58	121	38.3	0.17	173	17	3.2	16.7969
846	95	1	male	47	173.97	39.3587	1.74	39.5	9519	2.77	25.38	2.35	5.86	0.82	52	32	17	4.76	58	0.97	108.7	0.77	138.92	13.98	598	5.57	313.7	6	0.2	5.8	6.59	1.36	74	8.38	0.4	4.95	12.9	1.1	29	327.7	88.5	7.58	144	43.8	0.18	235	17	4.8	28.5467
490	96	0	male	50	157	43.6294	0.17	44	10361	4.98	27.4	2.55	4.29	1.07	22	20	14	3.7	57	1.03	105	0.99	144	9.33	388	5.53	382.8	5.9	1.2	4.7	7.53	1.3	81.8	10.16	0.9	4.43	13.1	3.5	32	330.3	96.8	11.91	141	42.8	0.19	162	18.6	5.5	23.4075
532	97	1	female	28	164	36.4066	0.43	38.8	7000	2.52	22	2.11	0.81	1.18	10	8	14	4.9	61	0.9	107	0.84	140	10.99	426	4.89	271.2	3.8	0.6	3.2	4.15	1.1	68.8	7.08	0.4	3.64	13.3	1.4	28.1	335.8	83.8	9.75	102	30.5	0.21	211	17.3	5.1	23.2434
1512	98	0	female	32	128	47.7646	0.84	40	9500	3.58	24.6	2.23	1.91	0.9	17	9	11	4.3	50	1.01	107	0.93	141	7.4	377	5.67	307.9	9.9	0.57	9.33	5.38	9.6	70.3	8.78	0.4	4.88	13	2	29	330.3	87.7	8.22	141	42.8	0.24	287	16.6	6.2	23.6614
723	99	1	male	60	144	45.1496		38	7448	2.86	21.8	2.38	1.5	1.91	25	14	13	5	76	1.09	111	1	145	12.64	330	5.28	346.1	7.1	0.01	7.09	5.6	0.7	70.3	6.94	0.5	4.83	14.2	0.6	28.7	321.3	89.2	9.03	138	43.1	0.16	176	17.7	5.4	21.2953
1756	100	0	male	59	119	57.257	0.64	40.4	9212	1.99	23.4	2.24	1.31	0.84	17	20	16	4.1	58	0.91	108	0.86	140	7.71	342	4.6	288.8	9	0.79	8.21	3.5	1.1	69.9	5.8	0.4	4.6	12.8	1.7	28.6	332.9	85.8	9.41	131	39.4	0.16	167	17.4	3.5	22.2949
229	101	1	female	52	142	36.6093	1.2	40.2	13065	2.57	21	2.4	8.98	1.43	31	16	13	4.3	61	1.5	103	0.89	140	14.96	587	15.04	453.3	10.6	0.9	9.7	6.82	2.9	78.2	9.04	0.5	4.39	13.9	2.5	28.2	330	85.3	9.23	124	37.5	0.21	226	17.7	5.8	27.3438
1359	102	0	female	48	155.3	33.7897		44	9572	1.53	25.4	2.39	1.78	1.37	12	21	28	4.05	85	1.09	110.1	0.97	143.47	12.77	314	4.75	304.7	12.5	2.6	9.9	3.65	1.98	70.4	3.42	0.3	3.69	13.6	1.4	31.7	332.4	95.3	8.82	117	35.2	0.22	249	17.1	1.6	26.6728
760	103	1	female	26	173	34.6122	1.28	37	7604	2.16	20.2	2.26	0.75	2.35	47	15	25	3.5	53	1.26	109	0.93	144	14.67	564	4.32	404.9	12.2	1.54	10.66	5.3	3.7	64	5.6	0.7	3.61	13.3	1	33.4	338.4	98.8	7.13	121	35.6	0.2	276	16.4	3.9	19.9219
902	104	0	male	50	131	54.3051	2.33	37.5	9712	2.47	26.2	2.27	3.1	0.85	21	32	27	4.7	61	1.09	107	0.89	141	7.2	515	4.78	303.5	5.9	0.6	5.3	5.08	2.6	73.7	4.6	0.5	4.37	12.9	2.1	31.7	349	90.8	8.6	138	39.7	0.17	194	17	1.8	26.7299
56	105	1	female	62	147	32.7276		33.2	8768	5.11	28.3	2.25	3	1.64	23	24	19	3.6	64	1.24	104	0.97	144	12.71	472	4.65	365.5	11	0.73	10.27	8.26	1.4	65.1	17.07	1.3	4.66	13.9	4.9	28.9	330.3	87.6	8.36	135	40.8	0.18	220	16.7	10.7	27.968
134	106	0	female	53	103.14	53.5086	2.54	33	9250	3.64	26.42	2.23	2.02	1.05	20	15	20	3.72	44	1.22	110.1	0.76	143.47	8.9	386	4.25	250.1	6.5	1.05	5.45	6.08	3.51	61.5	4.18	0.4	4.37	13.9	1.6	29.5	331.7	88.8	8.8	129	38.8	0.12	131	17.7	2.1	25.0361
190	107	1	male	28	165.84	47.6578	2.04	40.4	9896	4.5	24.18	2.34	2.23	0.99	32	25	17	4.54	95	0.96	107.3	0.84	139.05	11.11	643	5.35	299.6	9.7	1.43	8.27	7.09	0.82	73.3	7.37	0.7	5.18	13.3	2.4	28.8	334.2	86.2	8.25	149	44.7	0.19	232	16.5	4	27.7778
1324	108	0	male	29	149	53.8648	0.71	45.3	9237	3.83	25.7	2.38	2.11	1.03	60	27	17	5.7	117	0.87	106	0.71	140	10.38	441	5.62	290.2	8.5	0.7	7.8	5.73	0.9	76.3																25.6055
175	109	1	male	54	178	36.4469	11.79	32.6	7104	2.02	26	2.2	3.04	0.76	17	11	12	4.2	60	1.27	109	0.84	143	9.04	450	6.13	348.5	11	0.44	10.56	4.5	2.8	69.2	6.28	0.5	4.02	13.6	1	30.3	334.5	90.5	8.56	122	36.4	0.16	188	16.7	4.6	28.7347
38	110	0	male	55	139.05	48.7836	10.74	21	8480	3.18	28.28	2.02	1.63	1.05	15	11	18	4.29	70	1.26	108.5	0.87	140.74	8.83	380	5.24	202.8	4.7	1.14	3.56	5.06	2.13	49.6	7.99	0.41	3.79	12.1	2.15	29.2	347	84.2	8.5	111	31.9	0.19	223	15.9	5.2
322	111	1	male	58	143	46.1758	0.13	43.3	7017	1.75	28.6	2.24	2.06	1.02	21	12	23	4	86	0.71	106	0.91	143	7.59	376	5.59	325.2	9.7	0.87	8.83	3.66	2.9	76.3	7.08	0.6	4.14	12.6	1.8	31.4	318.9	98.6	8.56	130	40.8	0.16	192	17.2	4.4	17.9902
112	112	0	male	64	175	34.6799	5.07	33.3	7698	2.6	22.8	2.09	4.37	0.9	29	22	16	4.1	58	1.03	109	0.82	142	13.24	437	5.58	414.8	13.1	0.81	12.29	5.67	3.3	59	9.1	0.5	3.59	13.9	1.1	31.5	346	91	7.8	113	32.6	0.14	176	16.4	7.1	24.1115
520	113	1	male	57	128	53.1679	3.88	41.4	10632	1.13	20.3	2.42	3.54	0.92	37	24	20	4.8	67	1.35	108	0.81	145	12.78	547	7.21	341.7	7.9	0.38	7.52	3.66	5.8	72.8	11.5	1	4.5	13.4	2.1	30.6	334.1	91.4	7.83	137	41.1	0.19	239	16.8	7.7	28.9736
1741	114	0	male	62	126	52.3196	0.34	43	10056	2.56	25.8	2.2	5.37	0.87	24	20	20	3.9	42	1.01	104	0.88	139	8.16	424	4.67	352.6	9.5	0.6	8.9	6.27	1.3	73.2	7.04	0.5	4.98	13.2	1.8	31	332.7	93.2	8.05	154	46.4	0.13	163	17.5	4.5	25.333
68	115	1	male	64	160	38.6483	11.88	22.6	7320	4.11	23.5	2.12	1.15	1.09	29	13	20	4.2	125	1.48	109	0.93	140	14.26	435	6.09	148.6	2.6	0.2	2.4	6.09	11	57.5																27.7177
1651	116	0	male	65	131	48.8742	0.72	46.7	9704	1.77	22	2.4	1.69	0.95	28	18	21	4.1	82	0.96	105	0.96	142	8.7	293	6.88	337.7	9.1	0.95	8.15	3.53	6.1	84.1	9.15	0.5	4.71	12.9	1	31.3	330.3	94.7	8.43	147	44.6	0.2	233	17.1	7.5	27.0842
62	117	1	male	26	230	32.547	2.38	46	8923	3.41	24.3	2.31	1.29	1.02	21	35	25	4.1	78	1.38	110	1.12	142	17	480	5.29	443.4	7.2	0.18	7.02	5.2	1.4	74.6																26.5118
1640	118	0	male	30	168	46.2634	0.6	43.5	5498	3.15	28.1	2.36	1.16	1.4	16	10	11	4.3	49	1.19	104	0.84	142	7.63	366	5.37	289.3	30.8	5.12	25.68	5.13	2.3	75.2																24.3827
582	119	1	female	71	137	33.454	0.25	41.9	9001	3.21	18.5	2.39	2.31	1.02	17	11	14	5.3	80	1.32	108	0.9	140	11.33	410	5.6	204.3	6.6	0.6	6	5.29	2.9	73.8																25.8761
175	120	0	female	73	125	36.8534		41.6	7292	2.23	25.3	2.26	1.66	0.99	26	14	18	4	93	1.17	105	1.03	140	7.85	371	5.45	242.2	6.3	0.3	6	3.83	3.6	82.4	5.43	0.3	3.95	13.7	1.3	29.4	322.7	91	8.77	116	35.9	0.18	200	16.6	3.4	17.5781
688	121	1	male	53	189	34.1371	2.52	33.2	6926	2.58	25.1	2.02	4.22	1.02	19	21	15	4.1	69	1.01	108	0.9	143	16.06	491	5.13	369	6.2	0.6	5.6	6.47	3.3	62	9.52	0.8	4.41	13.5	2.4	32.4	338.7	95.6	7.96	143	42.2	0.16	200	17	6.2	22.7583
938	122	0	female	27	119	54.0307	0.22	42.9	7047	5	23.7	2.4	0.79	2.01	15	9	14	4.2	46	1.06	102	0.89	142	11.38	530	5.25	311.7	7.4	0.2	7.2	7.65	2.5	74.6																21.4844
93	123	1	female	40	127.57	45.3385	9.66	28.4	6907	4.05	23.2	2.16	3.46	1.43	30	16	11	4.62	51	1.57	113.1	0.82	141.27	13.37	505	6.43	306.4	5	1.15	3.85	8.09	0.01	52.7	8.71	0.6	3.55	14.8	2	30	324.3	92.4	6.93	106	32.8	0.14	206	16.6	5.9	18.0697
1112	124	0	female	47	98	59.3703	0.01	43.2	10200	3.24	27.9	2.59	1.1	1.12	70	52	31	3.8	111	1.03	107	0.91	142	5.93	317	5.45	258	13.5	1.93	11.57	4.76	3.8	73.3	4.86	0.3	4.53	13.2	1.4	30.9	339.1	91	7.6	140	41.2	0.13	168	16.9	3	24.4444
420	125	1	male	60	195	31.2941	3.62	35.2	7278	4.36	22.8	2.13	1.34	1.42	148	78	22	4.8	92	1.33	105	0.93	141	21.42	404	5.43	235.2	7.7	0.02	7.68	6.74	4.5	63.5	11.47	1.1	3.86	13.9	2.3	31	324.5	95.6	9.91	120	36.9	0.26	263	17.8	7.7	34.6627
1631	126	0	male	60	124	54.0963	1.62	36.8	8797	1.75	25.2	2.27	1.15	1.47	27	28	22	4.5	61	1.02	109	0.75	142	9.34	433	4.78	367.2	10.8	1.06	9.74	3.84	1.1	61.2	8.75	0.9	4.42	13.3	1.6	32	327.3	97.9	7.27	142	43.3	0.13	177	16	6.1	26.8544
424	127	1	male	44	196	34.8007		33.2	13214	4.98	29.1	2.26	2.66	1.01	27	12	14	4	54	1.09	108	0.97	144	11.9	532	4.23	333.4	2.8	0.3	2.5	7.75	1	64.6	12.11	1	4.16	12.9	2	29.8	331	90	7.41	124	37.4	0.26	348	16.4	8.6	35.1562
69	128	0	male	43	214	31.5142	0.6	39.5	6246	1.27	20	2.22	1.17	0.66	23	47	32	5.6	59	1.12	108	0.9	140	13.08	336	6.15	372.6	8.1	0.82	7.28	2.5	1.1	68	6.38	0.4	3.56	12.8	1.4	32	356.7	89.8	8	114	32	0.15	185	17.2	4.2
1393	129	1	male	46	170	40.7579	10.07	32.4	8096	2.93	21	2.16	2.17	0.66	40	12	14	3.5	55	1.1	110	0.81	142	10.46	610	5.54	293.1	9	0.59	8.41	4.67	0.5	63.6	11.5	1.1	4.17	13.2	2.5	31.2	347	89.8	6.3	130	37.4	0.2	321	17	7.4	26.7036
924	130	0	male	50	170	39.6286	2.9	41.8	9401	2.32	21.6	2.33	2.36	0.95	20	9	13	4.5	68	0.84	106	0.83	141	7.62	609	5.39	334.7	25.8	4.85	20.95	4.21	1	69.6																28.089
327	131	1	male	23	142.1	59.4984	2.26	41.7	8108	2.1	28.6	2.42	1.92	1.18	22	15	23	4.16	83	1.35	105.5	0.82	141.64	9.67	404	5.01	348.6	11.4	2	9.4	3.92	6.01	71.7																25.3515
732	132	0	male	22	165	50.0155	0.25	41.6	9177	0.9	20.6	2.23	4.07	1.13	32	16	10	4.4	59	1.21	110	1.16	144	24.81	445	4.6	429.9	3.7	0.3	3.4	3.19	2.9	69	10.55	1.2	4	13.1	3	30.4	329.6	92.4	11.36	122	36.9	0.21	182	17.8	6	23.1544
894	133	1	male	70	154	38.8056		37.7	7546	2.41	26.2	2.29	1.13	0.87	32	20	17	4.7	63	1.06	106	0.96	141	11.6	486	7.7	224.1	13.7	2.34	11.36	4.04	3.8	70.8																28.2335
1726	134	0	male	70	120	52.4658	0.43	41.6	7484	1.14	19.8	2.16	0.77	1.09	22	23	19	3.9	71	0.92	107	0.9	141	9.14	380	6	208.9	16.2	3.28	12.92	2.61	8.7	78.5																24.5089
1158	135	1	male	23	223	34.5057	2.18	44.4	8757	1.55	25	2.42	2.88	0.84	22	4	15	4.3	63	1.21	107	0.9	143	8.25	507	5.98	359.1	8.3	0.57	7.73	3.7	1.1	77.3																25.3069
892	136	0	male	25	165.6	48.7581	1.25	15.4	11486	4.14	35.7	1.84	3.57	1.17	29	21	23	3.29	67	0.72	99.8	0.97	139.5	18.01	545	4.08	142.8	5.9	0.7	5.2	7.25	3.8	38.8
608	137	1	male	65	125	51.7245		42.3	7646	1.94	24.5	2.45	2.11	3.56	82	30	21	5.2	67	1.07	105	0.92	142	12.95	374	5.55	396.7	9.3	0.44	8.86	6.41	3.5	72.8	15.48	0.9	3.59	15.5	1.9	33.6	323.5	103.7	8.23	121	37.3	0.19	237	17.2	12.6	24.0882
	138	0	female	44	159	33.7773	1.15	37.8	6574	3.03	22.7	2.26	1.27	0.87	12	8	12	4.4	72	0.8	113	0.87	145	9.9	493	5.61	266.6	5.9	0.1	5.8	4.35	0.2	75.9	6.09	0.4	4.75	19.3	1.4	22.1	299.7	73.8	11.17	105	35	0.27	246	17.5	4.2	23.4375
1547	139	1	female	70	118	40.3542	0.18	42.9	7402	2.85	23.9	2.37	1.13	1.93	18	15	20	4.4	74	1.24	108	0.95	144	12.48	422	9.01	265.9	9.2	0.62	8.58	5.52	2.4	71.9	6.51	0.4	3.84	13.8	3.1	32.3	336.5	96.1	9	124	36.9	0.17	191	16.9	2.8	22.9421
1101	140	0	female	61	105	49.5032	2.97	38.4	9105	2.99	24	2.38	1.52	1.41	32	27	30	4.7	79	1.51	111	0.97	147	8.39	338	6.57	297.4	7.1	0.2	6.9	5.17	3	70.9																25.7117
43	141	1	female	42	166	32.5166	11.48	23.1	10348	5.26	23	2.02	2.19	1.12	17	13	19	4.9	61	1.51	112	0.8	140	10.99	274	4.84	291.3	5.3	0.9	4.4	7.96	0.7	47.1	6.99	0.4	3.1	12.2	2.4	33.2	343.1	96.8	7.52	103	30.1	0.18	246	16.4	3.9
1547	142	0	male	64	165	37.2368	0.88	38.7	7906	2.39	23	2.21	1.57	1.1	8	21	26	4.4	60	0.82	113	0.8	144	7.34	315	5.61	269.4	9.6	1.17	8.43	4.27	1.3	65.6	6.86	0.7	4.33	14.3	1	31.5	317.5	99.1	9.35	136	42.9	0.12	129	16.9	4.9	28.7317
1013	143	1	male	44	131	56.6428	2.76	39.3	8641	2.68	24.2	2.44	3.94	0.76	32	34	25	3.79	77	1.16	107.6	0.73	139.15	6.56	450	4.05	328.2	6.8	0.2	6.6	4.68	5.09	70.3	12.91	0.7	5.65	14	1.7	31.3	330.2	94.9	9.42	177	53.6	0.21	224	17	10.3	25.2264
1431	144	0	male	43	148.4	49.0584	2.16	42.4	11785	3.73	24.7	2.37	3.81	0.89	39	18	17	4.05	62	0.82	105.8	0.85	137.59	8.43	351	6.01	343.4	19.7	3.1	16.6	5.93	1.29	76.6	7.62	0.5	5.81	14	2.1	30.3	327.4	92.6	9.17	176	53.8	0.21	232	17.7	4.8	28.7274
108	145	1	female	35	181	30.7636	0.41	34.9	5333	1.77	19	2.09	1.37	1.45	10	8	12	4.9	46	1.43	109	1	138	9.26	394	4.48	299.4	5.5	0.6	4.9	3.89	0.4	65.7	5.29	0.2	2.25	12.6	1.1	38.8	338.8	114.4	7.21	87	25.7	0.09	126	17.9	3.9	25.711
949	146	0	male	65	161	38.0897	0.66	35.8	2723	3.23	24.3	2.32	1.39	1.74	16	16	13	4.7	41	1.02	104	0.92	140	16.56	365	4.74	315.9	10.5	0.77	9.73	5.66	1.1	63.8																22.8571
189	147	1	male	46	129.51	56.6304	5.92	35.4	13768	4.12	27.67	2.21	1.67	1.27	33	13	22	3.8	40	1.08	109.4	0.87	143.6	8.33	602	6.43	299.6	11.6	2.35	9.25	6.91	0.52	57.5	4.18	0.2	3.81	12.8	1.4	31.8	340.5	93.2	8.99	121	35.5	0.17	191	17.5	2.5	24.3824
1012	148	0	female	21	128	51.6017		36.2	5754	1.86	22.9	2.18	0.83	1	10	11	12	4.1	62	1.2	105	0.78	139	6.41	321	4.58	175.7	15.6	3.08	12.52	3.22	3.9	75.6	5.48	0.4	3.2	12.6	1.8	29.7	343.9	86.5	8.76	95	27.7	0.18	211	16.7	3.1	19.8177
998	149	1	female	76	140	31.4645		43.2	8516	1.65	21.4	2.47	1.39	1.42	116	22	19	5.3	144	1.26	105	0.86	139	12.22	483	7.08	327.7	6.1	0.17	5.93	3.58	2	76.4	7.84	0.5	3.14	14.4	2.2	32.6	334.7	97.4	9.25	102	30.6	0.19	207	17	4.3	30.8642
38	150	0	female	68	100	49.9914	10.48	25.9	7633	3.58	27.4	2.1	3.64	1.06	13	8	17	3.8	66	1.22	107	0.98	141	8.78	187	6.57	218.5	3.3	0.2	3.1	6.39	2.3	55.7	6.7	0.3	3.62	13.3	1.6	29.4	332.9	88.4	7.11	107	32	0.18	253	16.9	4.7	18.0859
580	151	1	male	28	243.1	30.014		41.2	8391	3.03	24.4	2.4	2.56	1.07	48	78	19	4.38	82	1.53	105.4	0.94	138.35	13.88	651	4.92	486.4	10	1.8	8.2	4.96	1.85	72.7	14.52	0.6	4.31	13.7	1.8	30.8	329.7	93.3	9.9	133	40.2	0.23	236	16.6	12.1	25.963
1438	152	0	male	30	186	40.9068	2.81	41.8	11047	2.35	22.2	2.41	2.37	1.1	138	9	12	4.1	52	1.42	105	0.81	141	11.56	578	6.29	363.8	7.3	0.45	6.85	4.49	0.8	78.6	6.82	0.6	3.88	14	2.2	31.8	332.7	95.7	8.02	124	37.2	0.19	237	16.7	3.9	32.0386
35	153	1	male	39	181	39.6868	5.13	25.4	9060	2.89	26	2.18	1.69	1.02	66	22	10	3.9	32	1.67	109	0.87	145	18.17	554	6.31	292.4	2	0.3	1.7	4.95	5.9	59.9	15.86	0.9	3.14	12.9	6.5	29.6	329.4	89.9	7.46	93	28.2	0.21	276	16.3	8.4	37.9839
728	154	0	male	44	139	52.7256	0.34	46	8051	1.46	25.7	2.43	2.28	1.08	28	15	14	4.3	53	1.51	108	0.77	144	11.02	381	4.37	470.5	15.8	2.77	13.03	3.38	3.7	73.3	4.08	0.3	3.87	13.6	1.5	32.6	347.3	93.9	9.01	126	36.3	0.16	173	17.9	2.1	26.5434
470	155	1	male	52	142	48.5739	2.4	41.9	8524	2.93	27.8	2.38	1.53	1.22	16	13	14	5.2	76	1.36	109	1.09	142	9.85	411	5.02	299.1	7.5	0.2	7.3	5.09	2.2	75.7	10.56	0.7	4.95	13.7	1.8	29.1	328.3	88.7	11.33	144	43.9	0.21	182	17.9	7.9	20.5714
1778	156	0	female	26	125.07	51.2353	0.4	42.2	8166	3.06	26.39	2.42	1.74	1.49	10	8	13	4.69	38	1.23	109.3	0.92	139.01	8.03	486	4.43	341.2	9.2	1.01	8.19	5.83	2.91	69.5	6.55	0.6	3.45	12.9	2	31.1	332.4	93.5	7.69	107	32.3	0.16	209	16.8	3.8	20.5693
1085	157	1	female	32	180	31.6299	0.68	38.2	3437	1.44	28.6	2.25	1.07	1.49	18	9	8	4.1	25	1.22	105	0.88	141	9.23	375	4.49	280.8	18.5	3.44	15.06	3.45	1.9	65.2	10.55	0.5	3.81	13.1	3.6	31	330.7	93.8	8.86	118	35.7	0.16	177	16.6	6.4	21.0198
1743	158	0	female	33	128.36	47.2694	0.18	46.9	9942	2.84	28.34	2.5	1.48	1.85	15	13	20	4.14	59	1	101.8	0.82	136.52	7.75	391	5.03	353.4	9.3	1.28	8.02	5.77	1.72	76.2	6.6	0.4	4.22	11.9	1.5	32.7	333	98.1	9.24	138	41.4	0.21	233	17.2	4.4	21.3675
177	159	1	male	36	153.15	49.605	3.24	38.5	10370	5.07	24.43	2.39	2.47	1.17	56	38	29	4.44	93	1.02	105.8	0.84	139.09	7.3	592	4.91	412.2	9.1	1.54	7.56	7.5	1.03	73.6																27.7323
1582	160	0	male	37	156	48.1719	0.05	45.5	9436	2.71	22.8	2.28	1.12	1.72	29	19	14	4.1	41	0.91	105	0.94	142	5.4	533	4.77	297.3	22.4	4.21	18.19	4.91	5.2	74.6																27.4406
458	161	1	male	32	174	43.7231		26.8	9581	6.39	21.4	2.15	5	1.09	23	20	14	3.8	52	1.14	111	0.83	144	16.28	508	4.62	432.9	5.6	0.8	4.8	9.98	0.5	56	27.83	1.1	5.45	15.3	6.8	28.1	320	87.9	8	153	47.9	0.41	515	16.9	19.4	22.5306
1046	162	0	male	35	154	49.6215		48.2	8973	1.77	24.8	2.41	1.16	1.37	21	24	17	4.3	83	1.25	105	0.85	142	6.6	415	5.82	370.9	11.6	1.92	9.68	3.7	2.4	77.8	7.3	0.6	5.29	13.4	2.1	30.7	339	90.4	9.2	162	47.8	0.23	255	16.7	4.5
154	163	1	female	40	166	32.9766	1.27	41	9466	2.43	24.3	2.53	0.65	1.8	21	14	18	3.8	80	1.69	108	0.85	144	12.37	270	4.6	284.8	8.6	0.44	8.16	4.53	2.3	73.3	5.12	0.4	4.25	14.8	1.9	28.6	320.9	89.1	10.47	122	37.9	0.19	184	17.2	2.7	18.75
1714	164	0	female	42	139	40.3005	1.18	37.7	7151	1.96	20.3	2.18	1.5	0.82	111	19	17	3.8	84	0.94	108	0.82	140	6.73	311	5.25	280.2	7.5	1.04	6.46	3.46	4.5	75.3																29.2969
209	165	1	female	36	175	31.819	1.74	39.3	6514	3.27	22.8	2.23	1.02	1.54	16	7	14	4.5	54	1.32	107	0.92	140	22.18	504	4.83	301.4	6.1	0.3	5.8	5.56	0.9	66	7.19	0.5	3.38	12.6	2.7	29.8	333.6	89.3	10.21	101	30.1	0.18	176	17.8	4	17.6471
70	166	0	male	67	126	50.5139	17.67	22.9	8468	3.27	21.6	2.03	4.38	1.22	28	14	20	4	88	1.4	109	0.98	141	11.15	362	6.55	231.2	5.6	0.3	5.3	8.3	1.2	60.3	5.63	0.6	4.33	14	1.6	31.5	340.9	92.4	7.62	136	40	0.17	223	16.7	3.3	27.7634
1644	167	1	female	73	94	52.0152	0.02	43.4	7447	2.7	27.4	2.37	2.52	1.05	40	12	17	3.9	38	1.11	96	0.87	134	3.92	415	4.89	198.1	14.1	1.43	12.67	4.69	3	75.4	5.94	0.5	4.22	12.5	1.5	30.6	333.1	91.9	7.28	129	38.7	0.19	257	16.4	3.5	35.7012
1788	168	0	female	63	116	43.2733	5.41	26.9	10078	3.04	25.1	2.11	1.81	1.3	96	16	17	3.5	110	0.85	107	0.9	143	4.96	346	5.04	265.9	6.2	0.3	5.9	5.38	1	61.4	11.97	0.9	4.18	13.1	4	28.2	331.9	84.9	7.26	118	35.4	0.35	485	16	7	20.3244
818	169	1	female	34	175.3	32.2025	0.67	38.1	5774	4.66	21.3	2.41	1.15	2.19	25	20	25	4.46	67	1.61	106.6	0.94	136.07	15.42	591	4.83	291	6.2	0.5	5.7	8.14	1.25	70.1	6.94	0.3	4.03	14.9	2.6	29.3	328.5	89.1	9.36	118	35.9	0.22	231	17.6	3.7	19.7133
875	170	0	female	37	105	58.5937	1.65	35.4	8923	2.88	25.6	2.15	1.04	1.58	11	18	18	4.3	41	1.13	103	0.99	139	7.3	458	5.4	315.3	5.6	0.2	5.4	4.91	2.3	64.8	8.54	0.5	3.85	12.7	2	31.8	337.1	94.3	7.37	122	36.3	0.22	301	16.5	5.9	26.0375
465	171	1	female	75	117.3	39.2427		39.5	5331	2.53	26	2.19	1.72	0.91	18	8	21	4.32	68	1.43	105.5	1.05	139.07	6.43	412	5.75	197.5	11.8	1.4	10.4	4.38	2.99	79.7	3.49	0.3	2.95	14	1.1	32.8	328.6	99.8	7.73	97	29.4	0.15	192	17.5	1.7
1038	172	0	female	73	132.5	34.3465		44.5	9140	2.07	21.6	2.46	1.62	0.99	16	12	22	4.23	75	1.27	111.6	0.93	141.64	8.31	351	5.85	299	11.1	1.8	9.3	3.58	2.64	81.2																24.8358
1280	173	1	male	73	148	39.8665	1.38	38.9	5775	2.14	26.6	2.31	1.32	0.96	15	16	19	3.9	70	1.12	105	0.89	142	11.7	413	5.91	272.7	14.2	2.52	11.68	3.58	1.8	69.7	7.65	0.9	3.93	12.8	3.1	32.8	338.8	96.7	7.63	129	38	0.16	213	16.4	3.4	26.0262
939	174	0	male	67	177	33.4934	0.25	36.6	5099	2.38	24.6	2.28	1.27	1.9	43	21	11	3.8	45	1.21	101	0.85	140	16.27	358	4.55	405.8	10	0.6	9.4	5.14	3.8	69.9	13.42	1.1	3.78	14	2.2	30.2	334	90.5	7.42	114	34.2	0.2	271	17	10.1	24.2767
1568	175	1	male	28	161	49.3953	2.9	40.8	10235	3.46	23.8	2.3	1.2	1.64	10	13	17	5.4	64	1.49	109	1	144	12.03	446	6.9	297.8	7.8	0.3	7.5	5.68	1.6	74.4	7.61	0.4	4.08	12.9	1.7	30	324.5	92.6	8.7	123	37.8	0.18	203	17.4	5.2	21.7515
287	176	0	male	25	174	45.9268		40.9	8991	2.45	26.6	2.31	1.76	0.91	13	14	14	4.5	55	1.16	106	0.99	142	6.47	473	5.1	322.9	13	2.11	10.89	3.97	1.3	72.7	6.01	0.4	4.95	12.4	1.3	29.3	338	86.7	8.22	145	43	0.25	302	16.8	4.2	36.4938
1244	177	1	male	36	148	51.6994		40.1	14001	1.58	23.4	2.32	6.2	1.02	60	33	22	3.6	63	1.26	102	0.84	139	6.49	615	9.75	425.3	7.2	0.3	6.9	4.79	6.2	74.2	8.71	0.4	5.5	11.9	1.7	29.8	344.1	86.7	8.61	164	47.7	0.2	237	16.4	6.2	32.4074
469	178	0	male	40	144.6	51.6994	1.52	46	9523	1.91	26.5	2.41	5.41	0.77	29	23	21	4.05	37	0.87	105.1	0.88	139.86	8.57	401	5.11	372.3	7.3	1.9	5.4	4.49	3.58	76																24.968
482	179	1	female	33	142	41.8365	4.23	33.6	9339	3.63	22.4	2.33	5.28	1.01	51	13	13	4	45	1.41	108	0.73	140	9.08	357	4.75	361.1	8.4	0.1	8.3	7.46	0.8	55.7	9.01	0.7	3.75	13.3	3.8	31.1	341	91.1	7.61	116	34.1	0.22	295	17.1	4.3
1698	180	0	male	54	143	47.4916		40.9	7608	2.17	28	2.33	2.19	1.29	20	19	18	4.3	110	1.3	104	0.8	142	7.86	340	6.69	348.8	6.2	0.3	5.9	4.12	1.4	71.8	9.14	0.7	4.61	12.4	2.1	30.9	333.6	92.7	11.31	142	42.7	0.17	153	18.6	5.7	23.1837
1552	181	1	male	47	164	42.2695		43.9	9368	2.69	25.7	2.93	5.54	0.89	46	27	24	4.8	67	0.76	104	0.77	139	9.25	376	5.23	391.4	17.4	1.63	15.77	5.91	1.2	76.8																24.093
843	182	0	female	24	119	55.1814	0.3	43.7	6087	1.67	24.2	2.28	0.87	1.68	8	8	16	5.5	59	1.38	107	1.1	141	9.95	483	5.24	327.5	15.3	2.69	12.61	3.82	2.3	72.4																18.8271
1101	183	1	male	85	174	30.1315		38.3	5866	1.45	28.7	2.29	0.81	1.11	44	17	28	4.1	78	0.98	108	0.9	143	10.38	277	5.45	221.3	15.4	2.96	12.44	3.15	3.4	66.4	5.7	0.5	3.89	13.8	1.4	32.9	335.9	97.9	8.21	128	38.1	0.11	129	16.9	3.3	20.1951
1693	184	0	male	79	143	39.8427	0.18	39.3	10270	1.81	25.3	2.35	0.77	1.43	16	9	17	5.3	74	0.95	108	1.01	141	12.01	348	4.91	233.7	25.3	4.69	20.61	3.62	1.3	71.7	6.11	0.5	3.7	12.7	2	33.9	343.4	98.7	6.86	125	36.5	0.12	172	16	3.6	19.1571
1000	185	1	male	48	130	55.586	4.18	37	9284	3.42	23	2.24	3.2	0.71	23	15	17	5.4	80	1.11	108	0.96	140	13.38	420	13.53	230.9	9.4	0.44	8.96	5.43	3.8	71.2	7.75	0.7	4.56	14	2.2	28.7	325.2	88.1	7.95	131	40.2	0.13	164	16.6	4.5	30.8444
1806	186	0	male	48	125	58.2853	0.02	44.3	8241	1.44	27.2	2.34	2.24	0.81	38	24	19	4.5	66	1.07	105	1	140	5.47	402	5.55	394	7	0.32	6.68	3.05	4.3	79.4
1373	187	1	female	64	118	42.0914		45.5	9003	4.31	25.5	2.42	2.7	1.52	52	10	21	3.9	137	1.1	106	0.87	142	8.87	337	5.64	328.9	9	0.06	8.94	7.07	6.3	76.2	4.31	0.3	3.97	13.1	0.9	31.7	327.8	96.8	9.27	126	38.4	0.18	193	17.6	3.1	23.0112
1704	188	0	female	60	98	54.1888	0.13	44.5	10444	2.3	23	2.43	3.22	1.71	29	19	27	4	146	1.27	107	0.96	143	5.77	479	6.77	320	19	2.38	16.62	5.34	3.2	81.5	4.54	0.5	3.61	16.8	1.7	34.7	328.1	105.7	8.76	125	38.1	0.11	131	16.8	2.3	25.9516
1014	189	1	male	48	197.1	33.6083	5.16	45.6	9208	3.05	26.9	2.56	3.65	1.12	94	50	17	4.15	71	1.29	101.4	1.06	137.27	16.24	563	4.97	563.9	23.5	2.9	20.6	5.3	0.96	81.2	13.23	0.9	5.62	14.9	4.6	28.9	335	86.4	7.64	163	48.6	0.23	301	16.1	7.6	30.7564
894	190	0	male	52	173	38.258		42.1	7844	3.05	25.1	2.37	1.19	0.97	18	11	14	4.9	47	1.11	108	0.9	142	9.5	491	5.26	353.7	19.8	2.83	16.97	4.66	2.4	70.5																27.4648
265	191	1	male	48	170	40.1893	10.76	20.5	6197	8.76	29.2	2.08	4.55	1.56	29	15	18	4	44	1.12	110	0.87	147	8.25	270	4.67	398.1	4.7	0.3	4.4	13.91	1.1	47.7	7.37	0.6	4.77	14.6	2.4	28.6	322.3	88.7	8.83	136	42.3	0.24	268	16.7	4	27.4406
1183	192	0	male	47	158.87	43.9252	2	37	9667	2.52	26.62	2.34	5.07	0.85	25	20	18	4.34	48	1.05	107.2	0.74	139.11	10.14	482	5.58	389	7.8	1.53	6.27	5.37	1.25	65.5	7.47	0.6	4.51	12.7	2.2	33.1	343.7	96.2	8.13	149	43.4	0.21	264	16.6	4.5	27.1314
544	193	1	male	60	158	40.3587		40.3	10910	2.64	28.7	2.06	0.83	1.14	22	13	19	3.6	48	0.98	107	0.97	144	7.4	395	5.15	260	12	1.42	10.58	4.32	3.1	63.6																25.463
1280	194	0	male	61	123	54.246	1.03	41.6	9154	4.26	24.8	2.19	1.45	1.16	34	20	19	4.9	53	1.01	108	0.84	140	12.21	397	5.51	384.6	10.8	0.93	9.87	6.3	3.2	65.5	5.05	0.4	5.03	13.9	1.1	28.8	327.4	88.1	9.43	145	44.3	0.18	186	17	3.2	26.263
126	195	1	male	44	218	30.6008	5.34	39.6	11353	3.45	22.8	2.37	3.06	0.85	51	35	20	4.7	63	0.97	105	0.91	139	15.04	580	10.13	300.6	10.6	0.62	9.98	5.8	1.7	69.6	6.61	0.1	3.99	15.4	1.2	31.3	339.6	92.2	8.91	125	36.7	0.23	262	17.2	5.2	27.7743
553	196	0	male	45	188.3	36.2728	0.41	43.1	7884	2.85	23.7	2.41	2.4	0.83	15	24	18	4.73	66	1.16	108.6	0.84	138.18	11.79	401	4.67	327.4	7.5	0.8	6.7	4.87	4.19	77.2	4.2	0.4	3.64	12.8	1.6	32.2	341.4	94.2	8.8	117	34.2	0.18	203	16.9	2	23.0546
1221	197	1	male	33	176	42.8213	0.92	45.4	9747	3.24	20.8	2.45	1.74	0.85	22	10	14	5.7	69	1.07	112	0.99	144	17.2	546	5.57	375.7	6.1	2.1	4	4.89	1.5	74.3	3.3	0.3	3.25	13.2	1.3	32.5	340	95.8	8.6	106	31.2	0.06	70	18	1.5
1651	198	0	male	30	161	48.7062	1.55	46.2	8259	2.13	22.6	2.48	2.78	0.73	20	12	14	4.3	53	1.07	106	0.84	146	8.95	366	4.98	356.6	8.2	0.59	7.61	4.03	1	79.8	7.1	0.6	5.32	13.2	1.6	30	333.7	90	8.62	160	47.9	0.14	163	17	4.6	22.3765
1312	199	1	female	34	147	39.8414	0.49	40.8	4330	3.19	26.3	2.34	1.86	1.45	16	9	16	4.7	70	1.06	105	0.94	139	7.9	403	5.12	295.1	12.5	0.51	11.99	6.08	1.2	79.5	7.55	0.5	4.74	13.8	1.5	28.5	325.8	87.4	7.86	135	41.4	0.25	316	16.6	5.5	21.2585
1723	200	0	male	66	168	35.9261	0.98	42.9	7594	1.36	23.6	2.19	1.43	0.85	36	25	19	3.7	76	1.01	108	1	144	10.41	540	5.96	310.1	15.9	3.5	12.4	2.86	0.9	71.9	7.5	0.6	4.46	13.2	2.1	32	338	94.5	9.41	143	42.2	0.18	188	17.1	4.7	26.4463
871	201	1	male	30	161	48.7062	4.45	44	11119	2.31	25.2	2.26	2.19	1.1	68	65	52	5	73	1.05	105	0.9	142	11.04	539	5.14	418.4	5.2	0.2	5	4.46	1.8	76.2	5.83	0.4	5.41	12.2	1.9	30.9	341.8	90.4	9.49	167	48.9	0.16	169	17.2	3.4	27.2817
915	202	0	male	32	141	56.3805	2.52	36	8440	4.46	24.2	2.32	2.08	1.19	24	11	10	4.2	29	1.55	110	1.01	144	13.32	522	3.89	403.2	12.5	0.86	11.64	6.97	2.3	58.3	9.07	0.7	4.4	13.7	3.3	30.2	326.5	92.5	9.03	133	40.7	0.16	181	17.4	4.9	28.4055
137	203	1	male	31	188.01	40.096	1.04	44.5	7300	2.67	27.85	2.47	1.17	1.35	21	29	27	4.15	58	1.08	104.2	0.83	138.09	8.67	468	4.37	305.5	9.3	1.7	7.6	4.51	15.12	76.1	5.35	0.4	4.6	12.3	1.6	31.4	342.7	91.6	7.28	145	42.2	0.14	198	16.5	3.1	21.7993
1582	204	0	male	35	144	53.8174	0.75	44.3	9328	3.06	26	2.31	1.79	1.34	22	17	16	4.1	82	1.03	107	0.91	145	7.65	526	4.54	381.5	24.1	3.9	20.2	5.1	1.3	72.2																19.1571
1300	205	1	male	51	155	44.0007		39.6	5548	4.24	22.6	2.3	3.25	1.19	26	15	13	4.7	86	1.31	106	1.01	145	13.98	364	4.22	356.9	7.1	0.5	6.6	7.35	4.1	72.4	9.58	0.8	4.89	14.5	1.3	28.3	325.1	87	8.15	138	42.6	0.14	174	17.2	7.2	24.7555
1757	206	0	male	54	128	54.3002	1.22	41.4	7505	2.96	27.2	2.34	1.72	1.04	17	12	12	4	61	1.03	105	0.9	141	9.93	382	5.05	312.7	11.4	0.73	10.67	4.82	6	70.8	8.15	0.7	4.75	12.9	2	31	330.2	93.8	8.05	147	44.5	0.19	237	16.9	5.3	25
286	207	1	male	56	146	45.6683		35.7	7066	1.38	20.6	2.17	3.04	0.76	32	13	12	5	63	1.11	109	0.79	144	8.79	621	7.09	327.6	3.9	0.73	3.17	3.31	2.8	70.6	7.88	0.4	3.4	12.9	2.1	29.3	321.7	91	9.09	100	31	0.12	136	17.6	5
1439	208	0	male	61	166	37.7531	2.13	41	9832	1.29	23	2.28	1.95	0.82	28	23	21	3.9	60	1.2	108	0.76	139	11.86	573	5.77	352.8	5.7	0.3	5.4	3	1.9	74.3	8.45	0.8	3.39	12.5	2.2	32.9	340.5	96.5	8.14	111	32.7	0.14	175	16.7	5.2	28.8754
439	209	1	female	80	109	41.4036		39.7	8384	2.09	27.5	2.3	1.45	1.14	9	12	14	4.2	64	1.06	104	1.03	138	8.12	309	5.57	237.4	5.5	0.8	4.7	4	2.3	78.5	6.37	0.5	4.04	13.3	2.3	31.6	330.9	95.6	7.58	128	38.6	0.18	241	16.5	3.2	23.8281
1611	210	0	female	80	83	57.5601		40.1	7662	2.29	27.9	2.17	1.26	1.72	25	18	23	3.4	58	1.16	106	0.9	143	7.11	270	4.59	255	9	0.62	8.38	4.64	4.3	61.1	8.22	0.9	4.53	15	2.3	30.2	328.4	91.9	7.94	137	41.6	0.17	218	16.7	4.8	20.2395
1268	211	1	male	78	177	31.0028	0.4	41.9	6366	2.31	23.8	2.23	2.01	0.71	16	8	12	5.3	83	1.09	111	1.14	145	8.62	417	4.87	256.2	6.6	0.43	6.17	3.96	2.3	65.6	6.26	0.7	4.08	13.1	1.9	32.3	338.1	95.5	7.11	132	39	0.13	176	16.8	3.4
1179	212	0	male	71	133.39	45.8439		38.3	5906	1.86	21.55	2.32	1.14	1.67	20	17	14	3.53	79	0.76	111.7	0.9	144.18	12.02	267	4.26	279.5	12.2	2.43	9.77	4.22	18.87	68.7	9.45	0.8	4.24	16.9	1.2	30.6	323.3	94.5	8.98	129	40	0.11	120	17.4	7.2	27.6817
164	213	1	male	37	183	39.7171	4.14	32	8359	2.48	25.7	2.19	1.42	0.75	80	24	13	5.4	89	1.17	108	0.81	141	11.17	360	5.5	256.9	4.6	0.6	4	4.14	1.5	71	8.3	0.7	3.71	13.9	1.9	28.9	339	85.2	9.3	107	31.6	0.17	180	16.7	5.6	26.3958
1638	214	0	male	42	185	37.8457	1.25	42.4	12629	1.37	23.5	2.37	2.82	0.73	39	26	24	4.3	42	1.28	105	0.91	139	7.96	524	4.75	354.7	18.6	3.13	15.47	3.4	3	76.9																35.0112
193	215	1	male	48	159	43.5746		40	9089	2.63	27.1	2.21	3.19	0.79	42	9	20	3.9	63	0.92	106	0.83	141	10.41	548	4.98	328	9.6	0.75	8.85	5.24	1.2	70.1	6.2	0.3	4.35	13.9	1.6	30.7	355	86.4	7.8	133	37.6	0.22	287	16.9	4
1498	216	0	male	43	134	55.5018	0.34	42.3	6783	1.94	22.7	2.25	1.67	1.16	37	14	13	3.8	52	1.23	108	0.99	141	13.52	496	6.59	239.6	2.7	0.3	2.4	3.91	6.2	73.4	17.79	1.5	4.67	13.9	3	28.1	335.3	83.7	8.62	131	39.1	0.23	271	16.5	13.2	28.0277
1371	217	1	male	21	143	59.8814	0.67	42.9	7774	2.45	24.4	2.33	1.05	1.82	25	22	18	4.1	66	0.98	104	0.88	143	6.29	368	4.94	289.4	19.8	3.7	16.1	4.75	1.1	72.1																18.3058
1805	218	0	male	19	175	47.5731	0.21	47.7	7469	2.14	27	2.46	1.37	1.01	17	16	12	4.2	64	1.14	104	0.93	141	10.56	400	4.95	337	5.5	0.3	5.2	3.7	2.2	81.9	6.46	0.4	3.81	13.5	1.9	28.4	324.2	87.5	7.85	108	33.3	0.36	461	16.1	3.9	24.9337
1092	219	1	male	63	177	34.4478	4.69	38.6	9774	4.02	28.5	2.5	1.13	1.21	15	23	19	4.6	105	1.3	104	0.85	142	9.43	410	6.55	257.2	4.5	0.2	4.3	5.97	1	75.9	10.6	0.8	4.48	12.7	2	30.3	338	89.8	7.7	136	40.3	0.19	255	16.7	6.3	24.5329
1771	220	0	male	63	144	44.2081	3.22	33.9	14693	2.17	27	2.26	1.88	1.16	18	9	21	4.8	57	1.04	108	0.88	140	11.25	472	5.4	386	15.6	1.89	13.71	4.44	0.7	63.1	10.15	0.3	5.07	13.1	3.1	28.1	325.6	86.3	7.36	142	43.7	0.16	223	16.6	6.4	31.1791
372	221	1	male	43	144.01	50.8721	2.53	40.4	9762	1.22	22.05	2.32	8.83	0.83	23	12	11	4.68	79	0.95	108.7	0.88	138.92	12.24	427	5.66	112.4	8.6	1.36	7.24	3.3	2.23	68	7.29	0.31	4.49	12	2.21	32.7	343	95.2	8.8	147	42.7	0.21	237	16.2	4.58	27.5433
784	222	0	male	38	202	34.9994		43.4	6971	2.09	18.8	2.35	2.03	0.96	62	59	30	4.3	77	1.1	102	0.93	135	12.25	342	4.93	305.2	3.8	0.2	3.6	3.78	4.7	81.4	9.1	0.7	4.39	13.6	1.6	29.3	342	85.5	7.9	128	37.5	0.2	256	16.5	6.8	23.6244
478	223	1	male	74	134	44.641	1.35	27.3	11049	3.45	28.3	2.07	1.22	1.31	29	21	19	4.7	72	1.32	107	1.01	140	10.18	403	5.76	242.3	10.1	0.93	9.17	5.37	1.5	52.5	8.02	0.7	3.96	15.4	1.5	33.2	329.4	100.8	7.62	131	39.9	0.16	206	17.1	5.6	19.8347
1732	224	0	female	48	101	56.8442		40.8	8350	2.54	26.3	2.24	1.75	1.41	23	11	16	3.9	56	1.1	108	0.93	146	7.19	329	4.66	297.5	11.3	1.4	9.9	4.79	1.4	68.9	9.53	0.5	4.42	14.4	1.8	30.1	326.3	92.3	9.37	133	40.8	0.2	218	17.7	7
1244	225	1	male	79	177	30.7858		42.6	9240	1.32	22.1	2.51	10.08	0.91	20	12	15	4.9	44	1.07	104	0.95	139	10.7	448	6.08	430.1	9	0.3	8.7	5.85	2.5	76.1	7.28	0.4	3.8	12	2.1	31.9	338.6	94.1	7.32	121	35.7	0.21	287	16.2	4.6	20.9042
756	226	0	female	44	100	59.1717	0.16	41.8	6699	2.76	21.5	2.32	0.82	1.23	12	9	14	3.6	42	1.04	105	0.83	139	5.67	357	5.2	266.8	8.1	0.27	7.83	4.23	2.8	78.3	8.6	0.5	4.41	13.5	2.2	30.4	346	87.8	10.4	134	38.7	0.19	185	17	5.8	21.4844
787	227	1	male	47	197	33.866	0.41	43.1	8434	2.88	23.8	2.31	2.65	1.35	19	11	13	3.7	39	1.48	107	1.05	143	15.78	429	4.84	406.1	5	0.3	4.7	5.47	1.4	71.8	6.91	0.6	2.91	13.2	1.5	30.5	342.8	89.1	6.67	89	25.9	0.17	257	16.3	4.8	21.1463
112	228	0	female	18	155	41.8141	2.06	37.8	2893	3.14	27.5	2.3	3.33	0.86	25	10	14	3.3	49	1.36	103	0.99	140	6.1	367	4.41	245.8	6.1	0.3	5.8	5.51	5.8	62.4	4.95	0.6	3.64	16.5	0.4	29.4	335.9	87.4	9.44	107	31.9	0.18	193	16.8	3.9	22.2063
457	229	1	male	66	137	45.9742	8.13	38.5	8383	1.39	28	2.22	2.91	0.84	14	14	11	4.2	58	1.22	104	0.87	142	8.18	427	9.3	310.5	6.3	0.19	6.11	3.27	4.1	66.2	6.76	0.4	4.26	14	1	27.2	330.6	82.1	10.4	116	35	0.11	105	18.4	5.3	27.6361
909	230	0	female	42	151	36.4613	0.56	41.1	7517	2.78	19.6	2.35	1.27	1.23	11	14	18	4.1	46	0.85	110	0.85	142	9.27	446	5.3	289	19.1	2.35	16.75	4.59	0.5	76.2	7.66	0.4	4.22	13.3	2	32.4	334.2	97	9.13	137	41	0.19	203	16.7	4.8	21.3039
1223	231	1	male	71	168	34.6862	4.54	36.9	9319	2.4	23.3	2.3	3.47	1.02	41	13	15	4.6	98	0.96	108	0.91	146	11.6	470	9.53	338.2	15.1	1.92	13.18	4.66	3.1	72.4
692	232	0	female	36	165	34.165		39.2	11151	3.27	24.9	2.35	2.16	1.15	11	7	10	4.5	53	1.23	106	0.95	140	11.49	447	5.18	258.7	4.3	0.2	4.1	5.66	1.1	75.6	6.2	0.36	4.06	15.7	1.9	24.9	311	80	9.4	101	32.5	0.31	327	16.5	3.64	20.4511
189	233	1	male	56	166	39.1027	11.28	34.2	11408	2.17	23.2	2.29	3.09	1.04	13	11	15	3.6	108	1.1	108	0.81	143	6	333	6.98	309.3	7.9	0.3	7.6	5	2.2	67.8	9.08	0.6	4.54	13.8	2.3	28.3	333.3	84.9	7.47	128	38.5	0.21	287	16.6	5.5	28.6851
1680	234	0	male	60	124	54.0963	0.24	43.6	8509	2.89	28.9	2.27	2.25	0.97	30	22	21	3.8	72	1.07	104	0.95	141	5.61	410	6.48	336.5	13.8	1.59	12.21	4.8	10.3	83.2	8.3	0.5	5.26	13.1	2.2	30.1	337	89.3	7.5	158	47	0.14	186	17	5.5	30.0838
595	235	1	male	44	179	38.8353	1.1	38.5	11049	1.61	23.9	2.22	3.24	0.78	23	14	19	4.1	75	1.3	105	0.94	140	16.91	644	5.83	320.8	10.6	0.66	9.94	3.87	6.1	75.9																25.8304
1712	236	0	male	49	151	46.0563		46.3	9571	2.75	21.1	2.3	2.06	1.04	48	69	25	3.6	61	1.24	106	0.91	141	8.54	428	5.79	374.4	13.4	2.79	10.61	4.6	3.9	75	6.88	0.6	4.92	13	1.4	31.3	332.8	94	8.3	154	46.3	0.14	165	16.8	4.7	25.7318
676	237	1	female	69	144	31.9437	0.53	35.2	6812	2.18	22.2	2.18	1.08	1.63	16	14	19	4.7	91	1.04	106	0.71	137	14.26	328	10.33	198.6	4.4	0.6	3.8	4.52	2.3	71.3	8.5	0.6	3.67	13.1	2	32.4	347	93.5	7.1	119	34.3	0.23	322	16.5	5.5	23.3091
1652	238	0	female	65	111	45.0041	2.32	34.6	7941	2.77	24.2	2.41	1.87	1.05	22	22	26	5.4	116	1.31	110	1.07	144	6.66	309	5.32	276.3	8.1	0.3	7.8	4.67	1	70.1	7.18	0.4	3.74	12.6	1.8	29.5	326.9	90.4	10.87	111	33.8	0.26	239	17.7	4.8	22.6562
172	239	1	female	31	167	34.8746	0.84	41.5	6875	2.46	21.3	2.24	0.85	1.84	9	6	11	4.8	97	1.07	107	0.99	141	6.9	107	5.09	229	5.7	0.6	5.1	4.81	0.9	76	7.3	0.3	4.4	16.8	1	27	330	81.8	8.6	119	35.9	0.15	179	17	6	23.8281
1351	240	0	male	62	189	32.0457	2.6	47.5	10576	3.96	23.8	2.54	3.02	1.16	17	16	16	3.7	38	1.14	106	0.79	146	10.53	467	5.23	335	4.9	0.2	4.7	6.46	3.1	84.4																29.9836
308	241	1	female	21	135.36	48.2291	1.76	39	7971	3.86	26.94	2.39	1.86	1.46	12	10	17	3.76	39	1.22	103.8	0.73	138.9	7.96	428	4.07	342.4	10.4	1.09	9.31	6.33	2.67	70.3	8.38	0.7	4.34	13	2.6	30.6	334.9	91.5	9.77	133	39.7	0.23	236	16.8	5	21.5577
1729	242	0	male	53	149	45.5079	0.11	42.2	7282	2.89	25.3	2.4	1.41	1.18	10	16	22	4.3	87	0.87	109	0.92	147	5.42	398	5.84	274.6	14.1	1.63	12.47	4.68	1.6	78.2	6.51	0.4	4.52	12.9	2.2	31.9	335.5	95.1	9.91	144	43	0.16	161	17.2	3.8	21.6311
91	243	1	male	85	167	31.6651	0.98	39.1	7077	2.06	25.1	2.38	1.21	1.16	39	13	16	3.8	94	1.11	102	0.85	137	12.34	459	6.57	263	13.1	1.9	11.2	3.69	7.9	71	6.3	0.5	4.61	14.5	1.6	32.1	342	93.9	7.4	148	43.3	0.17	225	16.8	4	29.6875
661	244	0	female	56	108.67	49.1868	0.52	38.3	4844	3.38	26.8	2.36	1.17	1.19	15	14	21	4.43	46	1.35	108.7	1.07	143.29	14.94	603	4.84	319.9	10.7	2.26	8.44	5.48	2.25	69.6	5.2	0.4	3.03	11.9	2	31.6	334	94.5	8.46	95	28.6	0.2	233	16.1	2.5	21.048
581	245	1	male	18	162	52.5947	1.88	40.6	9356	2.33	27.2	2.48	1.34	1.02	10	10	18	4.1	105	1.2	108	0.93	146	11.76	597	5.42	341.1	3.4	0.3	3.1	3.96	1.4	71																24.968
945	246	0	male	22	171.4	47.7665	4.67	33.8	11278	3.14	26.9	2.26	0.74	1.48	14	10	16	4.31	50	1.28	107.9	0.8	140.67	6.51	483	6.65	260.2	8.1	0.6	7.5	5.11	1.41	61.9	6.8	0.4	4.61	12.7	1.9	29.1	348	83.6	8.7	134	38.5	0.25	289	17.3	4.3	22.7204
721	247	1	male	27	218	34.4822	0.74	43.9	8905	2.26	24.9	2.47	3.87	0.77	45	44	24	5	39	1.16	105	0.94	140	12.99	505	4.73	375	10.4	1.39	9.01	4.39	2.5	68.5	9.5	0.8	5.2	13	3	30	337	88.9	10.49	156	46.2	0.27	255	17.1	5.5	34.9368
1145	248	0	male	30	198	37.9287	0.52	39.5	10262	2.78	23.4	2.28	1.95	0.7	59	81	34	3.8	122	0.81	107	0.89	144	7.96	477	5.23	303.9	4.5	0.2	4.3	4.48	1.4	74.2	6.42	0.3	4.52	12.6	2.3	29.8	333.9	89.2	8.99	135	40.3	0.27	300	16.8	3.8	25.463
336	249	1	male	64	180	33.5187	14.01	20.8	10049	4.96	22.5	2.03	0.77	3.18	65	19	15	3.7	55	1.18	109	0.84	144	14.99	409	4.71	287.7	3.8	0.3	3.5	9.24	2.8	48.3	11.71	1.2	4.53	14.9	2.2	29.4	324.6	90.4	8.31	133	40.9	0.26	313	17	8	36.6782
1519	250	0	female	42	135.36	41.6144	0.51	39.5	7072	2.22	24.35	2.29	2.01	0.95	9	18	20	4.24	51	1.26	107.9	0.99	137.56	7.28	408	4.45	290.5	16.8	2.69	14.11	3.73	6.53	72.1	6.65	0.5	3.97	13.1	2.7	30.6	339.3	90.2	10.44	121	35.8	0.21	197	17.4	3.3	25.6369
159	251	1	male	30	151.14	52.5735		38.6	11954	2.41	24.44	2.46	5.05	0.89	18	14	13	3.46	46	1.47	104.1	0.83	139.68	10.73	563	4.45	407.2	9.5	1.49	8.01	5.69	4.01	63.2	16.83	0.7	4.8	13.1	2.3	29.6	337.3	87.7	7.8	142	42.1	0.22	277	17.3	13.7	28.7347
119	252	0	male	34	162	47.0035		51	9977	1.44	28.4	2.41	12.2	0.53	53	18	17	4.2	54	1.05	105	0.95	142	10.68	366	5.27	286.5	6.7	5.54	1.16	7	1.9	94.1																26.4236
761	253	1	male	38	189	37.9305	0.05	43.9	7828	1.82	24.48	2.38	2.24	0.67	25	16	17	4.97	53	1.26	109.9	0.89	137.68	13.03	459	5.27	315.5	8.6	1.47	7.13	3.5	6.88	69.8	4.41	0.3	3.68	14.3	1.5	28.9	326.1	88.7	9.39	106	32.6	0.14	148	17.9	2.6	24.8445
1030	254	0	male	43	184	37.8279	0.59	39.9	8797	2.2	25.8	2.15	2.87	1.15	22	13	19	4.1	62	0.99	108	0.9	142	11.24	455	5.62	378.7	18.1	2.28	15.82	4.61	1.4	73.6	8	0.6	4.89	13.2	3.4	32.7	341.5	95.7	10.19	160	46.7	0.21	205	17.5	3.8	23.6161
1176	255	1	female	42	153	35.8859	0.58	43.2	9323	3.67	23	2.31	3.69	1.24	40	9	11	4.6	43	1.18	106	0.88	137	11.39	476	5.32	363.2	4.9	0.8	4.1	6.59	2.3	78.5	7.26	0.6	4.12	13.4	1.7	28.8	324.5	88.7	8.69	119	36.6	0.25	285	17.3	4.8
1528	256	0	male	77	144	40.0674		39.4	4924	1.34	22.6	2.27	0.55	1.12	16	33	37	4.2	36	1.16	106	0.75	139	9.77	376	5.17	156.9	10	2.1	7.9	2.83	4.9	77.8	7.5	0.6	3.57	14.2	2.4	33.3	345	96.7	7.9	119	34.5	0.14	179	17	4.2	27.4589
735	257	1	male	33	210	34.5877	3.47	50	10048	4.98	27.3	2.43	2.5	0.98	34	21	16	4.8	81	1.13	106	1.13	145	10.9	659	5.33	415.7	14.4	1.27	13.13	7.04	2.8	85.7	9.6	0.6	5.15	13.6	2.9	30.8	345	89.4	8.2	159	46.1	0.23	278	16.5	5.8	28.4686
1593	258	0	male	38	162	45.7011	0.26	42.1	9461	3.27	23.5	2.35	2.28	0.87	31	22	19	3.9	87	0.87	108	0.91	145	6.26	444	5.18	329.8	10.2	0.61	9.59	5	3.1	72.7	7.86	0.4	5.87	12.9	1.8	30.2	325.5	92.7	8.7	177	54.4	0.18	204	17.2	5.1	21.2245
1710	259	1	female	37	164	34.1761	0.77	39.3	5492	2.09	22.9	2.37	1.45	1.48	24	11	19	4.1	29	1.12	110	0.83	142	8.44	327	4.4	390.8	11.1	1.17	9.93	4.36	4.1	64.5	9.76	0.6	3.88	13.1	1.5	31.6	336.2	93.8	8.34	122	36.4	0.18	210	17.6	7.4	23.1911
1738	260	0	female	42	102	58.5892		41.5	10301	2.14	24.6	2.27	0.78	1.63	28	22	23	3.4	75	0.96	108	1.04	144	9.08	284	5.05	218.5	10.1	0.83	9.27	4.2	1.3	80.4	5.77	0.7	4.51	12.9	1.8	29.2	326	89.5	10.78	132	40.4	0.16	150	17.6	3.1	27.993
1042	261	1	female	60	92	58.4901		43.5	11488	1.95	26.2	2.33	0.9	1.39	19	24	25	4.4	57	1.02	104	0.92	139	7.14	297	8.8	205.5	5.4	0.6	4.8	3.9	4.4	80.9																21.0334
1765	262	0	female	69	86	59.5712	0.87	40	9872	2.76	25.9	2.35	2.48	1	12	9	14	4	64	1.37	109	0.96	145	5.31	281	5.14	255.1	5.8	0.3	5.5	5.12	5	68.6	5.82	0.4	4.45	14.1	1.6	26.9	318.7	84.3	10.38	120	37.5	0.17	162	17.5	3.7	26.4381
679	263	1	male	45	214	31.0746		36.7	9971	3.9	29.7	2.36	1.48	1.39	44	22	23	4.1	19	1.29	108	0.84	144	11.54	581	5.16	387.7	4.7	0.3	4.4	6.14	0.8	65.2																24.6755
1063	264	0	male	43	162	44.1238	1.47	42	8966	1.64	23.9	2.28	2.1	0.73	12	49	31	4.3	71	0.82	112	1.02	143	8.36	415	5.03	296.6	9.5	0.88	8.62	3.34	5.7	72.5																26.7949
801	265	1	male	42	210	32.4687	5.1	40.2	9364	1.79	23	2.16	1.55	1.13	51	27	14	4.4	63	0.95	110	0.87	144	14.73	544	4.88	389.6	10.4	0.67	9.73	3.69	12.2	68.4	8.3	0.5	4.47	12.6	1.6	27.6	310	89.1	8.5	124	39.8	0.17	198	16.7	5.7	34.3125
188	266	0	male	44	210	32.0157	2.27	41.9	10561	2.29	28.5	2.27	4.3	0.91	17	12	28	3.91	34	1.02	105	0.94	140.6	9.9	504	4.38	388.8	15.7	2	13.7	5.22	2.56	68.9	5.93	0.2	4.77	12.7	1.7	30.5	342.9	88.9	9.02	145	42.4	0.15	165	17.3	4	25.9095
189	267	1	female	63	104	49.3806	3.96	36.1	7791	3.57	28.4	2.19	2.21	1.31	25	17	24	4.7	75	1.35	106	0.87	141	5.13	401	4.78	353.6	7.4	0.2	7.2	6.18	0.5	60.7																16.6493
966	268	0	female	65	154.5	30.174	9.99	22.1	9427	7.32	22.5	2.13	2.41	1.98	17	13	25	4.76	58	1.44	112	0.99	140.22	8.26	412	5.14	247.6	6.5	1	5.5	11.3	0.67	50.4																27.7211
92	269	1	male	62	128	51.3329	7.89	22	8789	2.95	29.3	2.1	1.47	2.04	49	28	16	3.3	81	0.99	112	0.92	146	9.99	427	4.38	398.4	9.7	0.3	9.4	5.87	2.6	45.2	7.8	0.5	3.22	13.7	1.4	33.6	343	97.9	8.03	108	31.5	0.14	175	16.4	5.9	25.1429
1388	270	0	male	68	111	58.4672	1.21	40.1	8101	1.32	24.6	2.35	1.96	0.81	33	19	18	4.3	69	1.03	109	1.02	146	5.17	544	5.75	276.3	11.8	1.94	9.86	3.04	4	77.1	8.03	0.5	4.04	13.3	2	30.9	337.1	91.8	7.82	125	37.1	0.16	204	16.7	5.5	24.5089
289	271	1	female	64	130	37.4405	2.94	37.3	10595	4.48	22.3	2.24	2.14	1.57	13	7	16	3.9	65	1	109	0.85	144	6.64	325	9.21	271.1	9	0.8	8.2	7.07	1.7	69	4.38	0.4	4.04	12.5	1.4	29.5	332	88.8	9.91	119	35.9	0.08	81	17.7	2.5	22.5466
1267	272	0	female	57	122	42.4664	0.02	39.7	6936	2.83	30.5	2.39	2.93	1.48	29	15	16	3.2	44	1.02	103	0.87	143	7.41	262	5.65	381.9	10.9	1.4	9.5	5.48	4.9	68.3	13.07	0.9	3.83	13.5	3.2	29.5	332.4	88.8	9.51	113	34	0.21	216	16.9	8.8	33.2986
836	273	1	male	64	187.28	31.9499	1.44	42.3	7346	1.45	26.75	2.33	1.7	1.16	15	9	15	4.12	64	1.04	105.1	1.01	139.66	9.43	369	5.21	277.4	14.4	2.8	11.6	3.19	0.83	81.3	7.43	0.4	4.42	13.9	2.2	29.7	329.4	90.3	8.11	131	39.9	0.23	283	16.3	4.4	32.1799
784	274	0	male	60	191	32.0881		39.7	4537	3.68	23.3	2.32	1.41	1.82	20	18	14	4.2	41	1.32	106	0.94	141	17.14	386	3.92	374.3	6.9	0.1	6.8	6.22	5.2	64.3	16.77	1.2	3.71	15.5	6	29.9	332.7	89.9	8.17	111	33.4	0.16	198	16.9	9.5	24.1633
123	275	1	female	53	140	36.9818	1.87	38.9	7673	3.64	24.5	2.23	0.82	1.91	15	14	20	3.7	79	1.26	110	0.9	147	12.58	361	5.68	277.6	8	0.6	7.4	6.16	2	74.6	3.57	0.4	4.31	12.8	1.2	31.6	338.3	93.4	8.45	136	40.2	0.16	193	16.9	1.9	22.7615
1652	276	0	female	48	165	31.4031		44.9	7594	3	29.9	2.59	1.16	1.5	20	21	26	4	55	1.53	107	0.98	143	7.5	371	5.18	350.2	7.1	0.3	6.8	5.44	1	80	6.58	0.3	3.89	12.5	1.3	28.9	314.1	92.2	10.21	113	35.8	0.17	166	17.4	4.7	21.2306
766	277	1	female	71	92	54.1407	0.47	40.6	7936	3	24.1	2.29	2.22	1.13	37	16	20	3.8	50	0.94	101	0.79	139	8.04	220	6.24	281.9	7.4	0.8	6.6	5.18	5.7	76.5	7.05	0.5	5.06	13.3	1.5	29.4	329.3	89.4	9.33	149	45.2	0.18	197	16.3	4.8	19.9293
1174	278	0	female	61	145	33.5087	0.41	42.8	7831	4.71	21	2.45	2.45	3.35	25	24	26	4.5	39	1.23	103	0.9	141	12.1	476	5.78	474.8	33.8	4.48	29.32	9.44	2.9	77.2	13.56	0.2	4.18	14.8	1.4	30.1	321.2	93.8	8.24	126	39.2	0.19	231	16.7	12	22.6562
783	279	1	female	54	145.93	34.9265		31.8	5254	4.79	24.21	2.19	4.26	0.82	9	7	17	5.59	20	1.3	110.9	1	136.8	14.84	414	6.56	233.4	6.8	1.47	5.33	8.02	3.09	59	6.11	0.5	3.16	13	2	29.4	329.3	89.2	9.1	93	28.2	0.17	189	17.2	3.2	27.3438
588	280	0	female	64	119	41.6641	0.16	42.5	9641	1.69	24.5	2.31	1.92	1.08	43	15	14	3.8	77	1.15	102	0.8	140	6.89	394	7.82	299.1	14	2.27	11.73	3.55	6.2	72.9																29.2969
84	281	1	female	58	150	32.848	4.11	36.2	6778	1	22.6	2.17	1.19	0.81	20	27	24	4.8	67	1.25	110	1.1	140	12.26	311	4.44	197.8	4.8	0.3	4.5	3.15	4.1	67.7	5.64	0.3	3.9	14.5	1.8	28.5	321.6	88.5	7.18	111	34.5	0.12	171	16.9	3.5	27.0538
1232	282	0	female	50	96	59.5996	0.82	40.4	7584	3.02	25.4	2.41	1.73	1.41	17	15	17	3.5	61	1.25	105	0.78	145	8.4	270	5.35	321.8	7.3	0.2	7.1	5.16	1.4	69.5	9.58	0.7	4.05	12.3	1.2	33.3	349.1	95.3	9.01	135	38.6	0.29	323	16.9	7.5	20.5078
104	283	1	female	75	144	30.6253		27.3	8970	4.03	23.7	2.02	1.97	1.62	10	7	15	3.3	109	1.34	111	0.85	144	10.91	305	8.49	205.3	7.4	0.2	7.2	6.81	1.7	60.2	7.61	0.4	2.95	13.8	1.4	32.2	339	94.9	9.77	95	28	0.12	127	19	5.7	24.1912
919	284	0	female	63	140	34.4731		43.1	8063	2.84	24.5	2.35	2.78	1.42	21	14	17	4.1	62	1.04	106	1.1	141	9.65	352	5.12	350.8	6.3	0.9	5.4	5.34	1.5	75.4	6.82	0.7	3.73	13.4	1.8	33.7	336.6	100	8.69	125	37.3	0.25	291	17.5	4.2	29.1363
587	285	1	female	55	130	39.8839	1.72	40.1	9129	1.81	28.7	2.43	2.76	0.94	18	33	27	5.2	71	1.15	109	0.91	144	13.14	455	6.81	295.8	10.9	0.46	10.44	4.2	2.6	73.8	7.34	0.5	4.35	12.1	2.3	30.6	332.1	92	7.75	133	40.1	0.18	227	16.8	4.1	30.0781
918	286	0	male	80	132	43.5838	2.51	36	7692	2.34	26	2.21	1.96	1.62	22	12	12	3.7	34	1.22	109	0.96	143	8.63	302	5.76	382.3	11.6	0.71	10.89	4.91	1	63.7	5.84	0.5	4.09	13.4	1.6	31.3	339.8	92.2	7.68	128	37.7	0.13	164	16.5	3.6	24.3265
246	287	1	male	66	113.51	57.7129	13.62	17.9	7139	7.26	31.29	2.21	6.11	1.25	54	16	20	3.75	58	1.14	107.5	0.82	143.7	10.43	329	6.13	269.6	8.1	0.1	8	13.77	0.97	42.1	8.92	0.4	3.32	17	0.9	31.8	337.6	94.1	8.69	105	31.2	0.13	153	17	7.5	23.8367
1668	288	0	male	62	153	41.3733		46.2	8748	2.62	24.7	2.58	1.18	1.16	28	24	21	4.4	60	1.11	105	0.87	142	8.42	366	6.45	335.7	8.8	1.02	7.78	4.2	2.3	73.7																27.3314
914	289	1	male	33	236	30.0354		48.1	8291	2.39	23.4	2.37	1.26	1.24	21	12	13	4.5	54	0.94	107	0.91	144	8.6	394	5.28	340.9	28.6	7.43	21.17	4.05	2.4	76.5	7.91	0.5	5.65	13.6	1.6	30.1	326.6	92.2	8.48	170	52.1	0.22	259	16.7	5.7	31.0953
	290	0	male	34	209	34.5443	1.16	41.5	4567	2.38	25.6	2.37	1.49	1.01	157	87	44	5	91	1.23	104	1.03	140	13.34	490	5.14	337.6	11.3	3.13	8.17	4.16	2.3	79.1	5.11	0.4	5.48	13.4	1.1	29.2	333.5	87.5	8.37	160	48	0.16	186	17.2	3.5	25.5593
104	291	1	male	35	193	37.7697	2.23	40.7	8837	2.49	22.4	2.38	4.41	0.82	36	17	17	5.8	79	1.3	110	0.92	145	14.47	511	6.16	443.9	4.7	0.3	4.4	4.67	2.8	75.1	9.56	0.8	4.3	12.8	2.2	28.5	325.7	87.6	8.17	123	37.7	0.24	293	16.5	6.2	26.1246
391	292	0	male	32	169.23	45.2174	3.48	37.7	9868	5.39	27.32	2.54	2.7	1.4	20	15	15	3.98	50	0.89	105.9	0.78	142.83	7.6	401	4.59	472.2	16.6	2.34	14.26	8.63	4.91	64	7.55	0.4	5.04	12.6	0.9	31.9	329.6	96.9	8.64	161	48.8	0.15	170	17.2	6.3	22.1893
396	293	1	male	54	178	36.4469	1.74	37.6	5901	0.99	24.8	2.11	2	1	15	15	17	4.2	67	1.16	108	0.87	143	22.03	496	8.6	315.1	4.4	0.05	4.35	3.2	2	67.3	9.22	0.5	4.47	14.3	1.5	29.1	325	89.5	9.89	130	40	0.24	245	17.1	6.7	19.0311
896	294	0	male	54	125	55.8797	0.37	44.1	11347	3.96	22.9	2.51	1.85	1	29	14	13	5	74	1.32	104	0.95	141	10.33	537	5.74	342.1	5.4	0.2	5.2	5.71	10.3	83.8	7.96	0.56	4.12	12.6	3.27	30.2	334	90.6	7.6	125	37.3	0.18	234	15.7	3.76	26.8122
77	295	1	female	45	162	32.7914	4.99	35.3	8579	2.18	24.6	2.17	1.1	1.03	12	11	16	3.1	54	0.94	107	1.14	142	8.34	356	9.13	165.2	6.8	0.46	6.34	3.82	0.9	70.4	11.2	0.6	3.05	12.7	1.9	32.4	347	93.3	9.4	99	28.5	0.21	218	16.5	8	27.5482
1451	296	0	female	45	101	58.0548	0.24	41.5	10056	3.22	26.1	2.46	2.26	1.73	26	16	21	4.9	45	1.23	105	0.97	142	4.48	399	5.96	320.8	11.4	0.5	10.9	6.34	1.9	78.6	7.5	0.5	4.24	12.2	2.4	31	342	90.5	7.5	131	38.4	0.16	219	16.8	4.4	21.5139
[truncated: 2 more columns]
