# Supplementary material for: Applying stacking ensemble method to predict chronic kidney disease progression in Chinese population based on laboratory information system: a retrospective study
Source: PeerJ journal article supplement (doi:10.7717/peerj.18436), 2024-11-01
Supplement: raw_data3.xlsx [file raw_data3.xlsx]

## Sheet: Sheet1
Number	ESRD	SEX	AGE	Cr	eGFR	24Upr	ALB	ChE	HDL	CO2	Ca	TG	HDL	GGT	ALT	AST	K	ALP	P	CL	Mg	Na	TBIL	DBIL	IBIL	TCHO	TBA	WBC	Monocyte count	RBC	RDW	Lymphocyte count	MCH	MCHC	MCV	MPV	HGB	HCT	PCT	PLT	PDW	Neutrophil count	K	CLU	Urea	PA	TP
1	0	female	24	153	40.7227	0.06	50.5	9203	1.19	19	2.27	1.05	1.52	13	9	23	44	1.2	108	0.94	140	530	14.2	2.86	11.34	2.99	2.4	4.58	0.3	3.58	12	2.3	32.3	337.6	95.6	7.95	116	34.3	0.18	232	16.7	1.9	3.8	4.89	8.34	286.4	79.2
2	0	male	31	137	58.7883	7.24	38.8	9127	3.89	28.3	2.22	1.92	0.96	45	37	26	94	1.11	103.1	0.87	138.94	538	6.3	0.5		6.1	5.87	7.04	0.5	5.56	12.7	1.7	29	335.8	86.4	8.81	161	48.1	0.18	204	17.3	4.5	3.85	5.74	7.89	372.6	66.5
3	0	female	29	183.83	31.4917	0.51	39.1	6522	2.34	22.67	2.35	1.09	1.15	8	10	15	84	1.33	107.9	0.81	141.24	394	9.6	2.07	7.53	3.99	0.78	4.13	0.16	3.74	11.1	1.45	29.7	342	87	9	111	32.5	0.22	247	16.3	2.33	4.55	4.17	12.38	209.2	70.6
4	1	male	37	169	43.7287	9.35	20.3	10625	5.28	22.4	1.94	1.34	1.51	62	12	13	73	1.29	111	0.91	141	463	3.3	0.1		8.03	1	10.51	1.1	4.19	14	3.2	30.1	333.6	90.2	8.69	126	37.8	0.3	346	17.3	5.9	4.4	5.11	12.54	288.7	47.5
5	0	female	22	113.2	59.447	0.28	46.6	9333	3.13	22.6	2.52	1.49	0.83	16	8	13	89	0.92	107.6	0.94	139.47	201	11.4	0.8	10.6	4.94	0.45	7.79	0.33	5	12	2.3	28.5	330	86.2	10.7	142	43.1	0.3	282	16.3	4.83	3.43	4.94	3.71	224.4	85
6	1	male	50	127	56.3797	1.57	36	7277	2.12	25.5	2.25	1.2	0.74	22	15	15	76	0.97	108	0.75	141	483	14.5	2.45		3.47	1.4																3.9	5.76	8.84	281.8	65.3
7	1	male	49	197.03	33.3874	11.08	36.4	11015	1.65	26	2.14	5.02	0.91	27	18	16	73	1.4	109	0.81	143.62	362	10.3	3.32		4.16	0.87	9	0.5	4.3	12.9	1.3	31.5	350	90.2	7.8	136	38.8	0.22	278	16.6	6.8	3.84	6.3	10.29	340.7	69
8	0	male	49	141	50.0341	11.1	30.4	8558	1.9	22.9	2.2	3.73	0.78	70	21	22	57	1.82	113	1	146	344	8	0.2		4.68	1.9	9.39	1.1	3.95	14	3.9	28.9	332.7	86.9	8.92	114	34.3	0.14	160	16.9	4	4.7	6.22	14.59	306.7	54.4
9	1	female	32	145	41.0798	8.35	33.4	7583	3.4	24.2	2.41	3.23	1.72	22	13	10	34	1.66	108	0.69	143	451	7.7	0.2	7.5	6.23	0.6	11.8	0.7	4.16	13	3.4	30.5	336.4	90.8	6.97	127	37.8	0.22	320	15.8	7.5	4.2	5.05	16.37	402.2	59.6
10	1	female	45	168.33	31.3064	4.33	34.1	8456	2.74	19.75	2.15	2.08	1.1	15	14	17	47	1.31	113.9	0.79	140.34	423	9.1	1.01		5.53	1.2	5.3	0.3	3.34	13.2	1.2	28.8	318.6	90.3	8.77	96	30.2	0.21	242	17.3	3.7	5.06	4.68	11.92	303.8	60
11	0	female	29	173	33.8904	0.63	33.2	3337	4.67	21	2.29	2.55	1.89	761	68	98	223	1.36	104	1	141	732	35.4	15.6		8.54	104.4	11.44	0.6	4.28	19.6	2.3	25.5	317.7	80.3	8.38	109	34.4	0.15	177	16.8	8.4	5.1	16.39	20.52	179	92.4
12	0	male	31	162	48.0045	1.88	42.7	7690	2.2	25.5	2.26	1.21	1	23	25	21	84	1.19	105	0.81	142	439	5.1	0.6		3.72	5.1																3.9	5.05	9.78	260.1	75.8
13	1	male	42	206.3	33.174	0.7	43	8689	2.96	25.7	2.53	5.05	0.82	46	21	24	39	1.46	106.5	0.81	141.79	525	14.1	1.2		6.01	2.97	11.72	1.2	4.03	12.6	3.6	33.7	341.9	98.5	7.76	136	39.7	0.18	234	16.8	6.9	4.06	4.85	11.45	394.5	71.5
14	0	male	42	202.4	33.9484	4.56	38.2	11553	2.92	21.9	2.37	1.85	0.77	17	11	18	120	1.03	108.6	0.83	139.05	435	13.5	4.1	9.4	4.79	2.23	5.38	0.24	4.55	12.3	1	28.7	341	84.2	9	131	38.3	0.19	214	16	4.09	4.47	5.08	10.67	393.3	66.5
15	0	male	20	204	39.2465	6.01	38.1	8921	3.05	22.4	2.29	2.27	0.72	20	15	21	74	1.11	108	1.13	140	500	1.4	0.1		4.87	14.3																5.3	5.23	19.63	319.6	65
16	1	male	45	168	41.6367	10.1	32	7738	4	20	2.32	2.54	1.35	47	14	35	67	1.33	108	0.91	142	659	7.3	0.2	7.1	6.77	1.5	6.93	0.5	2.77	14.9	1.1	30.5	322.6	94.5	7.96	85	26.2	0.11	144	17.3	5	3.7	4.88	13.11	212.6	65.8
17	0	male	31	148	53.5475	0.07	45.5	9332	1.86	26.3	2.39	1.4	1.13	18	16	18	71	0.89	103	0.79	140	327	14.5	2.56	11.94	3.44	3.3																4	5.04	5.34	377.8	72.8
18	1	male	72	108	58.7619	4.51	24.7	6237	3.39	25.4	2.21	1.91	1.34	23	9	15	40	1.18	112	0.95	143	421	8.3	0.3	8	5.47	2.2	6.17	0.32	3.25	12.8	1.58	30	329	91	8.5	98	29.6	0.13	156	16	4.18	4.6	4.74	9.78	197.4	47.9
19	1	male	47	165	41.96	12.28	25.8	10533	3.95	28.5	1.99	1.3	1.29	35	10	15	76	0.77	110	0.91	145	255	3.7	0.2		6	1.9																3.8	4.99	8.34	257.8	53
20	1	male	28	160	49.7688	5.34	33	8916	5.54	22	2.09	1.88	1.02	20	22	17	55	1.31	108	0.94	143	519	6.4	0.3		7.44	5.4	12.8	0.9	5.33	12.3	2.6	30.3	336.9	89.8	7.98	161	47.9	0.17	212	16.6	9	4.3	5.27	7.39	301.5	61
21	0	male	28	174	44.9691	2.41	39.1	8466	3.85	30.8	2.33	3.36	1.4	25	15	11	55	1.42	103	0.97	141	530	17.4	1.58	15.82	6.35	1.1	15.65	1.01	4.81	12.9	4.1	31	344	89.9	11.4	149	43.3	0.26	229	16.6	10.36	3.9	5.38	9.02	443.4	71.5
22	1	male	25	221.4	34.3218	3.04	40.5	8144	3.53	22.92	2.42	1.22	1.03	12	7	15	81	1.34	108.8	0.75	140.65	776	15.1	2.25		5.43	2.92	6.3	0.3	4.16	11.9	2.2	29.6	333.9	88.7	9.53	123	37	0.23	239	16.9	3.7	4.62	4.92	10.79	323.8	72.2
23	0	male	25	195	40.0164	0.69	45.6	8209	2.19	20.6	2.44	3.3	0.8	25	8	12	90	1.16	110	1	145	531	4	0.2	3.8	4.56	1.3	5.56	0.3	4.61	13.9	0.6	29.5	334	88.3	7.43	136	40.7	0.27	361	16.3	4.3	4.7	6.08	7.88	342.2	78.1
24	1	male	18	253.55	30.6008	5.86	40.3	7479	1.42	24.75	2.35	1.2	1.23	23	18	22	72	1.59	108.5	1.19	141.91	458	8.6	1.73	6.87	3.47	1.9	4.7	0.3	3.38	12.8	1.1	30.8	339.5	90.6	7.73	104	30.6	0.13	174	16.7	3.2	4.34	5.19	23.23	384.4	67.8
25	0	male	18	252	30.8285	0.22	41.9	4818	1.47	24.1	2.41	0.91	1.3	16	25	22	148	1.59	103	0.64	149	450	20.7	4.72	15.98	3.19	6.7	4.93	0.5	3.4	13.9	2	29.1	348.3	83.5	8.9	99	28.4	0.11	124	17.8	2.3	4.8	4.78	13.14	318	62.7
26	1	female	39	121	48.6721	13.1	24.6	15803	3.09	25.6	2.14	12.24	1.18	43	13	16	47	1.47	104	0.93	137	337	5.9	0.2		10.32	0.6	8	0.6	5.17	14.5	2.8	28.1	338	83.2	12	145	43	0.25	209	17.7	4.2	4.4	9.97	7.32	296.9	59.6
27	0	female	39	113	52.8683	1.1	35.3	7529	2.53	23.9	2.19	0.77	1.78	14	15	21	43	1.23	105	0.9	141	324	8.3	0.13		4.93	1.1	5.35	0.3	3.77	12.9	2	30.9	340.5	90.7	7.54	116	34.2	0.21	274	16.2	2.8	4.1	4.62	5.41	292.2	60.4
28	1	female	29	167	35.368	0.78	41	7031	3.51	22.3	2.33	1.21	1.33	9	9	16	60	1.08	105	0.91	140	439	7.8	0.06	7.74	5.46	1.5																4.7	4.86	7.59	267.9	72.1
29	0	female	29	111	57.9535	0.26	43.1	6171	3.1	24.7	2.34	1.55	1.03	8	8	16	48	1.5	105	0.85	139	445	8.1	0.06	8.04	4.88	3																4.5	4.89	6.42	221.2	78.5
30	1	male	72	119	52.2599	10.64	21.2	10186	5.14	24.7	2.1	2.21	1.26	17	14	124	53	1.03	112	0.86	143	411	5.9	0.2	5.7	7.77	0.7	8.97	0.3	3.71	13.4	2.3	31.9	332.7	96	11.28	118	35.6	0.24	212	17.3	6.3	4.5	6.01	15.34	170.1	51.6
31	0	male	72	118	52.7958	0.14	47.7	6906	2.5	25.2	2.25	1.46	1.01	18	28	19	50	0.87	105	0.92	141	229	10.9	1.53		4.13	8.5	5.62	0.4	4.56	13.2	2	30.3	334.2	90.7	8.36	138	41.4	0.14	172	17.1	2.9	4.2	4.89	6.63	291.8	78.8
32	1	male	21	204	38.9718	2.28	37	5427	2.22	24.4	2.22	0.86	2.16	15	15	8	38	1.79	111	1.06	146	289	9.5	0.54	8.96	4.94	7.5	9.54	0.9	4.19	14.1	1.5	30.9	340	90.9	7.24	130	38.1	0.15	211	16.3	7.1	5.4	4.84	21.9	453.8	62.1
33	1	male	32	191.75	38.8784	1.03	43.4	7951	1.99	24.82	2.31	2.37	0.89	14	8	9	96	0.87	106.9	0.79	138.23	478	9.6	1.49		3.94	3.17	7.17	0.5	4.18	12.8	1.8	30.8	334.4	92.2	8.95	129	38.5	0.2	226	17.5	4.4	4.37	4.94	10.26	342.7	67.4
34	0	male	32	158	49.1313	0.17	44.8	11225	1.37	23.3	2.48	5	0.74	29	29	21	55	0.94	98	0.74	137	459	10.3	0.79		3.86	2.1																4.5	6.15	5.1	342.1	77.8
35	1	male	46	201	33.2859	2.96	32.4	5196	2.17	22.4	2.24	0.95	2.86	22	15	14	38	1.29	108	0.9	141	432	6.1	0.3		6	2.1	15.1	0.7	3.46	15.6	1.7	32.1	340	94.5	6.2	111	32.7	0.19	307	17.8	12.7	3.7	4.82	19.36	417	57.7
36	0	male	46	183	37.2839	0.84	43.3	9293	1.2	24.6	2.25	3.12	0.75	73	25	16	66	1.04	105	0.92	140	443	16.4	2.89		3.23	2	7.5	0.5	5.18	13.9	2	28.8	322	89.6	9.65	150	46.4	0.18	188	18.1	4.9	4.4	6.07	10.27	355.1	75
37	0	male	56	119.5	58.1807	0.17	44.4	6114	3.33	23	2.37	1.5	1.09	116	47	50	82	0.9	105.6	0.83	138.22	391	16.1	3.6		5.28	8.11	4.8	0.3	4.21	15	1.2	30.3	342	88.5	9.2	127	37.2	0.16	174	16.9	3.1	3.82	5.47	6.91	260	80
38	0	female	50	127	42.4923	0.85	44.3	8887	3.34	27.5	2.35	1.79	1.28	14	25	28	42	1.37	108	0.94	145	367	5.2	0.1		5.67	0.8	5.91	0.4	4.16	13.4	1.9	30.6	327.3	93.5	9.39	127	38.8	0.26	279	16.8	3.5	4.3	5.51	6.68	328.8	76.2
39	0	female	42	131	43.2947	1.81	42	8756	2.78	18	2.15	1.13	0.99	17	12	17	46	0.99	111	0.87	141	596	7.9	0.1		4.46	2.9	6.8	0.4	4.11	13.5	0.8	31.5	355	88.9	7.7	130	36.6	0.2	260	16.5	5.4	4.4	5.84	10.91	393.5	78
40	1	male	62	125	52.8261	10.44	28.7	8415	5.2	22	2.12	1.61	1.28	25	9	10	45	1.01	110	0.77	139	329	7.3	0.6		7.57	0.9	6.91	0.3	4.02	13.7	1.9	29.8	332	89.7	9.21	120	36	0.18	191	17.3	4.4	4.3	6.14	7.29	299.1	54.8
41	0	male	62	119	56.063	0.22	42.2	3683	2.34	23	2.41	1.46	1.05	37	16	18	80	1.04	105	0.84	141	448	16.4	3.32	13.08	3.9	8.4	5.92	0.4	3.85	13	2.3	34.4	348.5	98.8	8.07	132	38	0.08	96	18.1	3	4.1	5.67	7.27	239.3	79.5
42	1	male	22	175	46.5811	2.34	35.4	9376	2.7	25.2	2.11	1.5	1.02	13	14	12	37	1.09	107	0.81	142	641	7.8	0.65		4.38	1.9	7.42	0.5	4.52	12.6	2.2	29.8	333	89.5	10.04	135	40.4	0.21	212	17.5	4.6	4	5.57	10.07	265.9	64.6
43	0	male	27	148	55.0735	0.19	49.5	8152	1.31	23.5	2.46	6.16	0.81	77	79	27	81	1.39	108	0.93	141	348	12.8	1.78	11.02	3.67	1	9.85	0.42	4.34	12.8	2.95	29.7	340	87.6	9.3	129	38	0.22	233	15.9	6.29	3.7	5.93	9.1	495.7	72.6
44	1	female	59	126.31	40.1527	0.27	42.3	9338	4.8	28.17	2.35	2.99	1.27	20	15	16	80	1.05	106.5	0.91	139.81	466	7.6	2.02	5.58	7.25	5.4	6.31	0.4	4.69	12.6	1.6	29.8	339	88	7.79	140	41.3	0.15	192	17	4.2	4.67	5.96	11.47	313.7	71
45	1	male	34	175	42.8155	6.84	25.3	17282	4.25	26.8	2.03	1.43	0.86	11	13	12	53	1.58	109	0.92	143	380	7.4	0.1		5.81	4.9	6.5	0.3	3.78	12.8	1.8	30.7	352.9	86.9	7.63	116	32.8	0.23	296	16.6	4.1	4.4	9.37	11.23	234.6	53.3
46	0	male	66	121.1	53.3689	0.26	40.5	5931	1.47	24.9	2.4	1.29	0.86	15	20	20	50	1.1	107.6	0.85	139.39	448	13.5	2.6	10.9	3.14	3.18	10.96	0.9	3.96	12.8	3.1	32.7	340.9	96	7.81	129	38	0.19	247	16.7	6.5	3.76	6.15	7.18	234.3	77.6
47	1	male	72	140	42.9374	5.16	24.2	5071	4.45	23.1	2.15	2.23	1.55	82	13	18	88	1.09	110	0.64	142	465	6.2	0.3		7.37	11	8.65	1	3.62	16.2	3.6	30.4	323	94.2	6.39	110	34.1	0.19	304	16.2	3.9	3.3	5.16	11.53	262.2	48.9
48	0	male	64	118	55.8477	0.54	45.5	8537	1.72	24.9	2.29	2.46	0.86	16	24	17	60	1	105	0.8	142	502	14.5	2.45		3.4	2.1																3.9	6.72	6.59	350.4	73.9
49	1	male	22	177	45.9455	5.77	34.9	7746	3.49	18.3	2.2	1.07	1.91	15	15	15	49	1.58	111	1.13	140	427	3	0.3		5.89	1.7	7.53	0.8	3.15	14.3	2.3	30.7	329.4	93.3	10.06	97	29.4	0.17	173	18.3	3.5	5	5.08	14.93	378.2	63.9
50	1	male	29	202.53	37.1656	4.3	36.9	9871	2.01	26.05	2.32	7.47	0.75	46	9	12	70	1.12	107	0.89	137.78	561	11.7	0.2	11.5	5.63	1.27																4.49	5.11	7.68	383	72.2
51	0	male	29	171.8	45.3466	0.51	42.9	5925	1.55	26.8	2.46	1.68	1.74	21	22	13	48	0.88	104.9	0.92	140.66	392	11	2.4	8.6	3.79	3.56	8.38	0.48	5.3	13.7	2.02	28.7	331	86.9	8.9	152	46	0.22	247	16.2	5.84	3.65	4.53	7.82	380.4	67.9
52	1	male	18	181.28	45.9093	7.33	33	10757	5.99	22.37	2.35	3.57	0.85	28	31	20	95	1.46	112.9	0.98	142	424	6.2	0.98	5.22	8.72	1.89	9.8	0.6	4.39	12.4	2.9	30.2	322.4	93.7	8.92	133	41.1	0.32	356	16.9	5.9	4.85	4.94	18.56	380.4	63.4
53	0	male	27	139	59.4133	0.31	49	8913	2.52	25.4	2.38	1.73	1.21	25	30	19	75	1.42	105	0.74	143	422	10.6	0.87	9.73	4.29	7.4	9.01	0.43	4.86	12.8	2.67	29.8	336	88.7	11.6	145	43.1	0.28	244	16.7	5.81	3.7	5.13	11.22	454.6	74.9
54	1	male	65	143.3	43.8489	17.04	22.4	9133	4.3	22	2.09	3.25	0.76	15	18	25	70	1.27	110.2	0.92	137.53	320	4.4	0.2		7.25	1.23	7.14	0.5	3.85	12.9	2.2	30.4	320	95.1	8.8	117	36.6	0.23	266	17.1	4.1	3.63	4.6	7.99	196.3	53.3
55	1	male	73	142.4	41.7696	3.92	35	9869	2.68	25.5	2.16	3.42	1.24	46	33	30	75	1.04	106.9	1.03	138.62	518	6.2	1.8		5.34	5.63	7.82	0.6	4.13	12.7	1.7	31.9	331.1	96.4	7.28	132	39.8	0.17	235	16.6	5.3	3.95	6.09	6.39	292.2	65
56	1	male	56	173	37.198	2.56	34.2	10713	4.59	23.5	2.25	2.87	1.17	74	28	19	74	1.2	108	0.87	138	312	6	0.2	5.8	7.54	3	10.22	0.56	3.94	13.3	2.46	30.2	342	88.4	8.2	119	34.8	0.31	373	15.9	6.9	3.2	5.51	11.98	359.7	61.5
57	1	female	31	176	32.7302	4.93	38	10980	1.52	18.3	2.22	5.71	0.7	114	22	13	69	1.33	107	0.89	140	508	3	0.2		3.82	1.1	10.73	0.5	5.45	14.1	1.7	21.7	314.7	68.9	8.38	118	37.5	0.29	348	17.2	8.2	4.8	5.18	13.37	313.8	71.4
58	1	female	25	195.38	30.0887	1.8	38.9	8692	1.91	20.71	2.26	2.21	0.72	9	14	16	62	0.79	110.5	0.72	139.62	480	8.3	1.55		3.51	1.17	7.46	0.9	4.11	13.1	2.7	30.1	329	91.5	11.28	124	37.6	0.19	172	17.7	3.7	4.1	4.88	6.82	321.8	73
59	1	male	47	216	30.2984	11.87	30.5	11984	2.45	22.3	2.11	2.63	0.94	29	9	12	68	1.35	108	0.72	142	334	7.3	0.8		4.62	0.7	12.56	0.8	4.51	13.9	2.1	28.9	336.6	85.7	7.49	130	38.6	0.15	205	16.8	9.5	3.2	4.97	8.56	360.8	63.7
60	0	male	47	126	58.1334	2.82	42.7	9798	3.06	23.9	2.44	2.16	0.93	26	13	19	50	1.01	103.9	0.78	136.1	575	17.7	3	14.7	5.33	3.62	7.5	0.5	4.42	12.2	2.8	31.2	344.2	90.5	8.61	138	40	0.23	270	17.1	3.9	3.8	5.2	6.33	290.7	80
61	0	female	61	139	35.2652	12.29	25.1	9006	3.52	24.8	2.15	1.31	2.71	20	33	33	73	1.15	114	0.94	144	246	4.8	0.2	4.6	7.21	1.2	10.43	0.5	2.78	13.6	2.5	33	344	96	6.9	92	26.7	0.29	414	16.4	7.4	4.5	4.88	11.05	267.4	50
62	0	female	26	135	46.7147	0.15	42.1	7437	2.37	22.2	2.27	1.12	0.86	17	8	8	66	0.96	103	0.95	136	435	7.5	1.12	6.38	3.57	2.6	8.05	0.49	4.79	12.3	1.77	30	331	90.6	9.5	144	43.4	0.26	271	15.9	5.6	4.6	5.37	8.71	268.1	77
63	0	female	62	98	53.4328	5.36	36.1	7834	1.67	25.4	2.41	2.06	2.54	53	38	41	63	1.09	107	0.89	144	256	11.8	0.85	10.95	5.12	5.9	8.17	0.46	3.42	14	3.03	29.9	344	86.9	8.2	102	29.7	0.21	253	15.6	4.6	4.6	8.43	8.92	333.2	59.4
64	0	male	27	170	46.5775	0.02	53.9	9932	2.04	25.7	2.51	1.81	0.88	20	44	21	72	0.99	103	0.89	142	454	14.8	3.14		3.53	7.4																4.2	5.38	5.86	381.8	86.3
65	1	male	46	194.05	34.7326	5.49	32.7	11807	5.01	19.63	2.16	2.44	0.82	46	22	28	71	1.08	114	1.02	138.54	434	6.6	1.08		7.67	3.27	6.76	0.4	4.03	13.8	1.7	29.5	335.2	87.9	8.49	119	35.5	0.16	194	17.3	4.6	4.67	7.76	14.12	291	66.8
66	0	female	47	154	34.3755	0.16	39.2	5920	1.84	25.1	2.41	1.77	1.78	18	16	18	34	0.93	104	0.91	140	402	7.8	0.55		4.32	8.7	9.53	0.9	5.2	16.3	2.4	20.6	317	65	7.81	107	33.8	0.31	391	16.1	6	3.8	4.25	17.86	332.3	71.5
67	1	female	74	99	48.5141	3.2	35.3	5824	2.06	24.4	2.33	1.01	2.06	15	15	14	38	1.28	108	0.98	145	433	17.9	2.17		4.76	3.1	6.9	0.4	3.55	14.5	1	31.1	338	92.2	8.6	110	32.7	0.14	168	17	5.4	4.2	5.4	15.7	384.7	57
68	1	male	70	164	35.9634	2.51	36.1	6837	2.28	24.8	2.19	0.68	1.96	15	16	19	78	1.19	105	1.04	140	406	5.8	0.1		4.7	1.9	6.73	0.6	3.46	13.1	1.5	29.9	330.7	90.5	6.86	104	31.3	0.18	255	16.4	4.3	5.2	8.09	12.72	248	74.2
69	0	male	70	168	34.9307	1.5	42.8	9209	1.73	27.75	2.42	0.92	0.8	34	17	15	91	1.01	102.9	0.82	141.07	377	16.4	4.15	12.25	2.89	3.33	7.13	0.63	4.78	12.3	2.03	31.3	338	92.5	8.8	149	44.2	0.18	209	16.2	4.2	3.92	6.43	8.69	268.1	75
70	1	female	41	159	34.4966	4.18	33.6	9289	3.43	19.8	2.22	1.68	1.21	14	8	12	43	1.18	108	0.83	139	540	3.6	0.2		5.69	2.8																4.7	5.22	12.06	341.1	67.7
71	0	female	63	91	58.0321	0.34	37.8	7385	3.72	29	2.4	3.35	0.88	450	89	86	149	1.09	104	0.75	140	420	9.5	1.39		6.32	13.1	5.42	0.4	4.05	15	1	31.4	332.7	94.3	7.31	127	38.2	0.1	131	17.3	4	3.6	5.1	4.91	267.1	78.9
