# Supplementary material for: Applying stacking ensemble method to predict chronic kidney disease progression in Chinese population based on laboratory information system: a retrospective study
Source: PeerJ journal article supplement (doi:10.7717/peerj.18436), 2024-11-01
Supplement: Supplementary_Table_1.docx [file Supplementary_Table_1.docx]

Supplementary Table1. Critical characteristics in the unmatched and propensity-score matched cohorts

|  | Unmatched cohort | | |  | Matched cohort | | |
| --- | --- | --- | --- | --- | --- | --- | --- |
|  | **Progressive cohort** | **Non-Progressive cohort** | ***p* value** |  | **Progressive cohort** | **Non-Progressive cohort** | ***p* value** |
| **(N =148)** | **(N =839)** | **(N =148)** | **(N =148)** |
| **Age(years),median[IQR]** | 48[34,62] | 55[42,65] | <0.001*** |  | 48[34,62] | 49[36,61] | 0.756 |
| **Gender** |  |  |  |  |  |  |  |
| Male | 99(66.892) | 450(53.635) | 0.003** |  | 99(66.892) | 100(67.568) | 0.901 |
| Female | 49(33.108) | 389(46.365) |  |  | 49(33.108) | 48(32.432) |  |

Values are presented as median (IQR) for continuous variables or n (%) for binary variables, * p < 0.05; ** p < 0.01; *** p < 0.001.
