# Supplementary material for: Applying stacking ensemble method to predict chronic kidney disease progression in Chinese population based on laboratory information system: a retrospective study
Source: PeerJ journal article supplement (doi:10.7717/peerj.18436), 2024-11-01
Supplement: Supplementary_Table_2.docx [file Supplementary_Table_2.docx]

| Supplementary Table2. Confusion matrices in training and validation cohort based on 3 laboratory variables | | | | |
| --- | --- | --- | --- | --- |
|  | **Model** | **Predictive** | **Actual** | |
|  |  |  | Progressive | Non-Progressive |
| **Training cohort** | XGBoost | Progressive | 148 | 0 |
|  | Non-Progressive | 0 | 148 |
| LightGBM | Progressive | 136 | 10 |
|  | Non-Progressive | 12 | 138 |
| RandomForest | Progressive | 147 | 1 |
|  | Non-Progressive | 1 | 147 |
| **Internal validation cohort** | XGBoost | Progressive | 128 | 36 |
|  | Non-Progressive | 20 | 112 |
| LightGBM | Progressive | 123 | 37 |
|  | Non-Progressive | 25 | 111 |
| RandomForest | Progressive | 120 | 37 |
|  | Non-Progressive | 28 | 111 |
| Logistic(Stacking) | Progressive | 131 | 35 |
|  | Non-Progressive | 17 | 113 |
