# Supplementary material for: Applying stacking ensemble method to predict chronic kidney disease progression in Chinese population based on laboratory information system: a retrospective study
Source: PeerJ journal article supplement (doi:10.7717/peerj.18436), 2024-11-01
Supplement: Supplementary_Table_3.docx [file Supplementary_Table_3.docx]

| Supplementary Table3. Confusion matrices in training and validation cohort based on 6 laboratory variables | | | | |
| --- | --- | --- | --- | --- |
|  | **Model** | **Predictive** | **Actual** | |
|  |  |  | Progressive | Non-Progressive |
| **Training cohort** | XGBoost | Progressive | 148 | 0 |
|  | Non-Progressive | 0 | 148 |
| LightGBM | Progressive | 141 | 2 |
|  | Non-Progressive | 7 | 146 |
| RandomForest | Progressive | 148 | 0 |
|  | Non-Progressive | 0 | 148 |
| **Internal validation cohort** | XGBoost | Progressive | 125 | 31 |
|  | Non-Progressive | 23 | 117 |
| LightGBM | Progressive | 129 | 30 |
|  | Non-Progressive | 19 | 118 |
| RandomForest | Progressive | 125 | 35 |
|  | Non-Progressive | 23 | 113 |
| Logistic(Stacking) | Progressive | 139 | 35 |
|  | Non-Progressive | 9 | 113 |
