# Supplementary material for: Applying stacking ensemble method to predict chronic kidney disease progression in Chinese population based on laboratory information system: a retrospective study
Source: PeerJ journal article supplement (doi:10.7717/peerj.18436), 2024-11-01
Supplement: Supplementary_Table_4.docx [file Supplementary_Table_4.docx]

Supplementary Table4. Baseline clinical and biochemical characteristics of patients in external validation cohort

| **Clinical characteristics** | **Progressive cohort（N =36)** | **Non-Progressive cohort (N =35)** | ***p* value** |
| --- | --- | --- | --- |
| **Age(years),median[IQR]** | 45.000[29.000,56.000] | 32.000[27.000,56.000] | 0.756 |
| **Gender** |  |  |  |
| Male | 27(75.000) | 22(62.857) | 0.269 |
| Female | 9(25.000) | 13(37.143) |  |
| **Laboratory characteristics** |  |  |  |
| **Biochemical indexes** |  |  |  |
| Cr (μmol/L) ,mean(±SD) | 168.239±34.069 | 148.481±33.880 | 0.018* |
| eGFR ,median[IQR] | 41.080[34.497,45.909] | 48.005[39.247,55.848] | 0.003** |
| 24hrUpr (g/24h),median[IQR] | 4.930[2.560,8.350] | 0.510[0.190,1.880] | <0.001*** |
| Alb (g/L),median[IQR] | 33.236±6.183 | 41.826±5.594 | <0.001*** |
| PCHE (IU/L),mean(±SD) | 8916.000[7583.000,10533.000] | 8466.000[6522.000,9203.000] | 0.086 |
| LDL (mmol/L),median[IQR] | 3.367±1.261 | 2.448±0.872 | <0.001*** |
| HDL (mmol/L),median[IQR] | 1.210[0.890,1.340] | 1.000[0.830,1.300] | 0.285 |
| CO2 (mmol/L),median[IQR] | 23.452±2.546 | 24.303±2.620 | 0.175 |
| Ca (mmol/L),median[IQR] | 2.216±0.125 | 2.347±0.098 | <0.001*** |
| TG (mmol/L),median[IQR] | 2.210[1.300,2.990] | 1.730[1.290,2.460] | 0.317 |
| GGT (IU/L),median[IQR] | 22.000[15.000,43.000] | 20.000[16.000,37.000] | 0.752 |
| ALT (IU/L),median[IQR] | 14.000[12.000,18.000] | 21.000[13.000,30.000] | 0.007** |
| AST (IU/L),median[IQR] | 16.000[13.000,19.000] | 19.000[16.000,23.000] | 0.006 |
| ALP (IU/L),median[IQR] | 68.000[47.000,74.000] | 71.000[50.000,84.000] | 0.112 |
| K (mmol/L),median[IQR] | 4.293±0.529 | 4.187±0.443 | 0.371 |
| P (mmol/L),median[IQR] | 1.280[1.080,1.350] | 1.090[0.990,1.330] | 0.048* |
| CL (mmol/L),median[IQR] | 108.000[107.000,110.200] | 105.000[103.900,108.000] | <0.001*** |
| Mg (mmol/L),median[IQR] | 0.887±0.120 | 0.877±0.093 | 0.715 |
| Na (mmol/L),median[IQR] | 141.000[139.620,142.000] | 141.000[139.470,142.000] | 0.908 |
| Urea(mmol/L),median[IQR] | 11.470[8.560,13.370] | 8.340[6.590,10.910] | 0.002** |
| UA (μmol/L）,median[IQR] | 448.861±103.989 | 426.571±106.803 | 0.383 |
| GLU(mmol/L),median[IQR] | 5.160[4.920,5.760] | 5.370[4.890,6.070] | 0.573 |
| PA(mg/L),mean(±SD) | 312.892±66.072 | 316.594±71.413 | 0.824 |
| TBIL (μmol/L),median[IQR] | 7.300[6.000,8.600] | 11.000[7.900,14.800] | <0.001*** |
| DBIL (μmol/L),median[IQR] | 0.300[0.200,1.200] | 1.530[0.500,2.890] | 0.01** |
| IBIL (μmol/L),median[IQR] | 7.270±1.743 | 10.351±3.290 | 0.01** |
| TCHO (mmol/L),median[IQR] | 5.810[4.760,7.250] | 4.320[3.570,5.120] | <0.001*** |
| TBA (μmol/L),median[IQR] | 1.900[1.200,3.000] | 3.180[1.900,7.400] | 0.011* |
| TP(g/L),median[IQR] | 62.689±7.588 | 73.420±8.652 | <0.001*** |
| **Hematologic indexes** |  |  |  |
| WBC (10^9/L),median[IQR] | 7.530[6.900,9.800] | 7.500[5.560,9.010] | 0.151 |
| Monocyte count (10^9/L),median[IQR] | 0.500[0.400,0.700] | 0.460[0.400,0.500] | 0.107 |
| Lymphocyte count (10^9/L),median[IQR] | 2.088±0.721 | 2.147±0.823 | 0.775 |
| RBC (10^9/L),mean(±SD) | 4.026±0.605 | 4.329±0.641 | 0.072 |
| RDW (%),median[IQR] | 16.958±0.577 | 16.671±0.626 | 0.077 |
| Neutrophil count (10^9/L),median[IQR] | 4.600[4.180,6.800] | 4.500[3.500,5.810] | 0.12 |
| MCH (pg),median[IQR] | 30.300[29.800,30.800] | 30.000[29.000,31.200] | 0.519 |
| MCHC (g/L),median[IQR] | 333.435±8.424 | 336.836±8.772 | 0.141 |
| MCV (fl),median[IQR] | 90.600[89.500,93.300] | 88.900[86.900,90.700] | 0.103 |
| MPV (fl),median[IQR] | 8.477±1.357 | 8.755±1.114 | 0.404 |
| HGB (g/L),mean(±SD) | 120.935±15.823 | 128.643±17.368 | 0.085 |
| HCT (%),mean(±SD) | 36.226±4.513 | 38.254±5.346 | 0.126 |
| PLT (10^9/L),median[IQR] | 240.323±62.706 | 235.107±72.055 | 0.771 |
| PCT(%),median[IQR] | 0.200±0.053 | 0.204±0.060 | 0.775 |
| PDW (%) ,median[IQR] | 13.100[12.800,14.000] | 13.200[12.700,13.900] | 0.616 |

Values are presented as median (IQR) for continuous variables or n (%) for binary variables, * p < 0.05; ** p < 0.01; *** p < 0.001. Abbreviations: BMI, body mass index; estimated glomerular filtration rate (eGFR); 24hrUpr, 24-hour urine protein; Alb, albumin; ChE, cholinesterase; LDL, low density lipoprotein; HDL, high-density lipoprotein; TG, triglyceride; GGT, gamma-glutamyl transpeptidase; ALT, alanine aminotransferase; AST, aspartate amino transferase; Ca, calcium; ALP, alkaline phosphatase; K, potassium; P, phosphorus; CL, chlorine; Mg, magnesium; Na, sodium; UA, Uric Acid; GLU, glucose; PA, prealbumin; TBIL, total bilirubin; DBIL, direct bilirubin; IBIL, indirect bilirubin; TCHO, total cholesterol; TBA, total bile acid; TP, total protein; WBC, white blood cell; RBC, red blood cell; RDW, red blood cell distribution width; MCH, Mean corpuscular hemoglobin content; MCHC, mean corpuscular hemoglobin concentration; MCV, mean corpuscular volume; MPC, mean platelet volume; HGB, hemoglobin; HCT, hematocrit; PCT, platelet hematocrit; PLT, blood platelet count; SD, standard deviation; IQR, interquartile range
